# Supplementary material for: Speciation and population divergence in a mutualistic seed dispersing bird
Source: Springer Nature journal article supplement (doi:10.1038/s42003-022-03364-2), 2022-05-09
Supplement: MOESM1 [file 42003_2022_3364_MOESM1_ESM.pdf]

## Supplementary information

### Speciation and population divergence in a mutualistic seed dispersing bird

#### Supplementary Figures

- Supplementary Figure 1.** Vegetation and distribution maps of plants associated with Nutcrackers
- Supplementary Figure 2.** Cross-validation error of admixture models
- Supplementary Figure 3.** Phylogenetic analyses based on mitochondrial genomes.
- Supplementary Figure 4.** Multispecies coalescence tree based on the nuclear genome.
- Supplementary Figure 5.** Maximum likelihood tree based on the nuclear genome.
- Supplementary Figure 6.** Divergence time estimation based on mitochondrial alignments.
- Supplementary Figure 7.** Divergence time estimates of the Eurasian nutcracker species complex.
- Supplementary Figure 8.** Principal coordinate analysis of morphometric traits
- Supplementary Figure 9.** Within-species principal coordinate analysis of morphometric traits
- Supplementary Figure 10.** Discrepancy between morphology and genetics in one specimen.
- Supplementary Figure 11.** Phenotypic variation in beak morphology between nutcracker species.
- Supplementary Figure 12.** Within-species genetic variation based on admixture analyses.
- Supplementary Figure 13.** Phenotypic variation in beak morphology between subspecies.
- Supplementary Figure 14.** Reconstruction of demographic history (PSMC).
- Supplementary Figure 15.** Possible topologies for the nutcracker species complex.
- Supplementary Figure 16.** Approximate unbiased (AU) test for phylogenetic inference.
- Supplementary figure 17.** Similarity in phylogeographic and divergence patterns between Sino-Himalayan passerines.
- Supplementary Figure 18.** Synteny between the assembled nutcracker genome and chromosome level flycatcher genome

#### Supplementary Tables

- Supplementary Table 1.** Calibration points and tMRCA prior settings used for molecular dating.
- Supplementary Table 2.** Measurements and comparisons of morphometric traits for the three main *Nucifraga* groups.
- Supplementary Table 3.** Measurements and comparisons morphometric traits within the northern *N. caryocatactes* group.
- Supplementary Table 4.** Measurements and comparisons morphometric traits within the southern *N. caryocatactes* group.
- Supplementary Table 5.** *Nucifraga* genome assembly summary statistics
- Supplementary Table 6.** Repeat content of the de novo assembled *Nucifraga* genome.
- Supplementary Table 7.** Sample collection information.
- Supplementary Table 8.** Short read mapping statistics
- Supplementary Table 9.** Additional taxa included in the divergence times estimation.
- Supplementary Table 10.** Phenotypic traits measured for the morphometric analyses.
- Supplementary Table 11.** Plant and bird associations and distributions

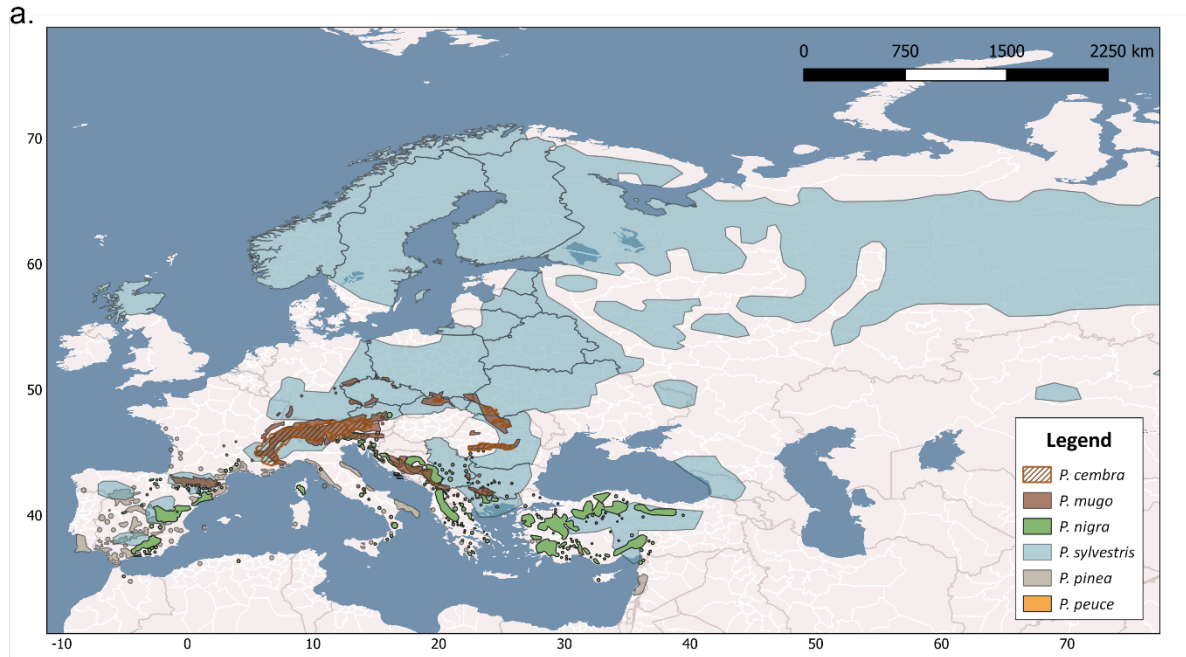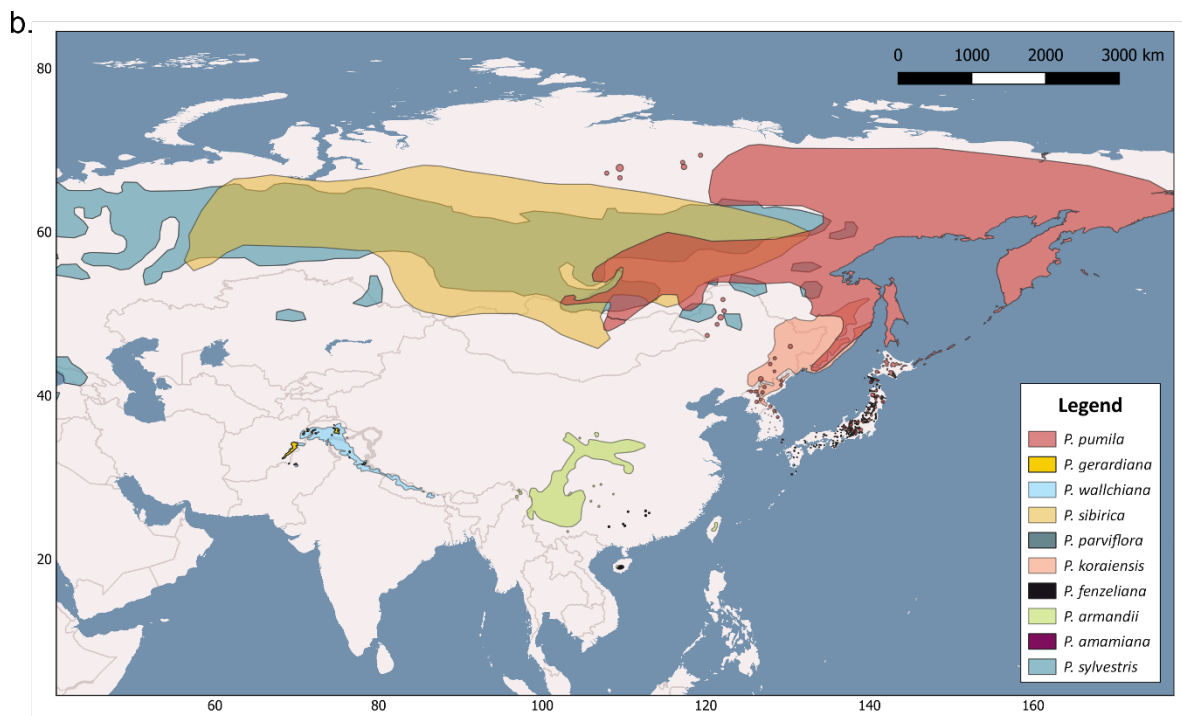

**Supplementary Figure 1. Vegetation and distribution maps of plants associated with Nutcrackers. a) European pine (*Pinus*), b) Asian pines, c) Hazelnut (*Corylus*) and d) Spruce (*Picea*). See Supplementary Table 11 for further information.**

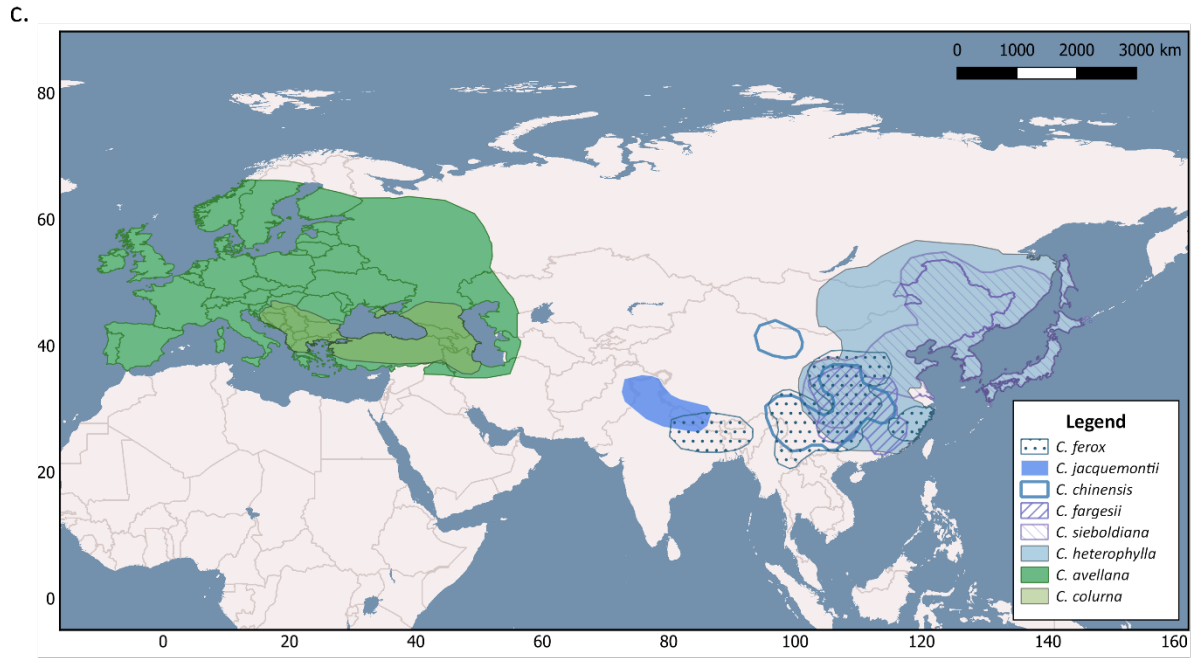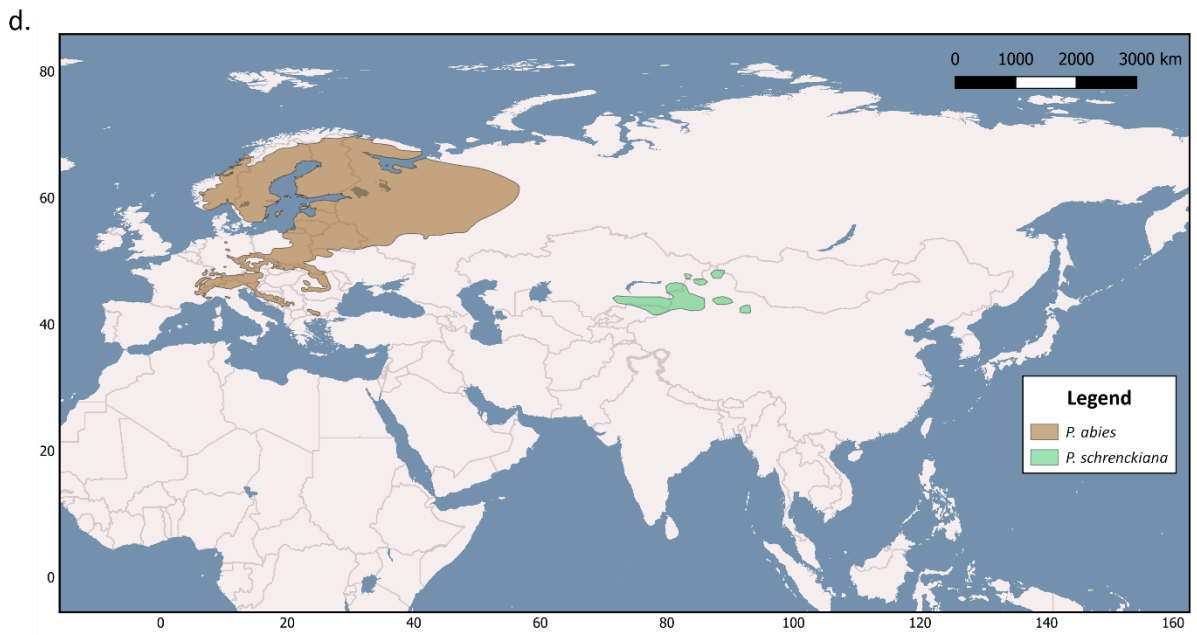

**Supplementary Figure 1 (continued). Vegetation and distribution maps of plants associated with Nutcrackers.** a) European pine (*Pinus*), b) Asian pines, c) Hazelnut (*Corylus*) and d) Spruce (*Picea*). See Supplementary Table 11 for further information.

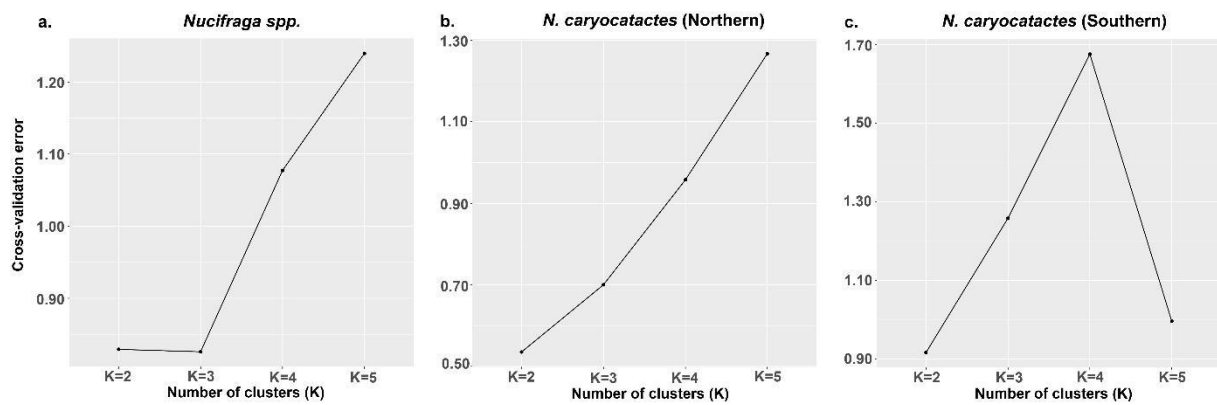

**Supplementary Figure 2. Cross-validation error of admixture models** **a.** Admixture analyses of between-species variation identified K=3 as the optimal number of clusters. **b.** Admixture analyses of within-species variation of the Northern *N. caryocatactes* group identified K=2 as the optimal number of clusters. **c.** Admixture analyses of within-species variation of the Southern *N. caryocatactes* group similarly identified K=2 as optimal number of clusters.

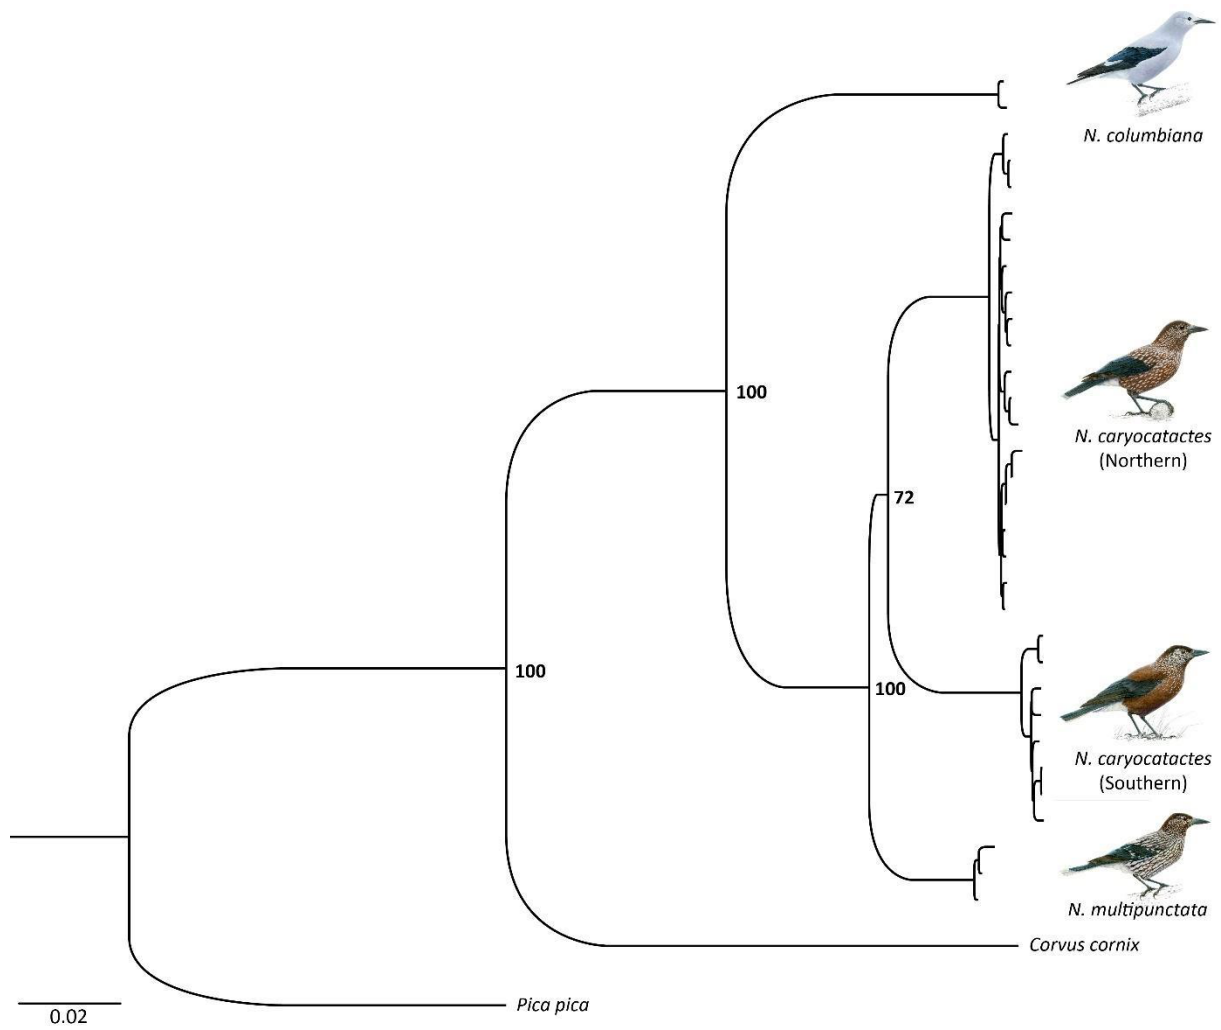

**Supplementary Figure 3. Phylogenetic analyses based on mitochondrial genomes.** Maximum likelihood tree inference was performed based on a 10,851 bp protein-coding mitochondrial alignment. Numbers at the nodes represent ultrafast bootstrap support. Bird images by Jon Baldur Hlidberg, courtesy of the authors.

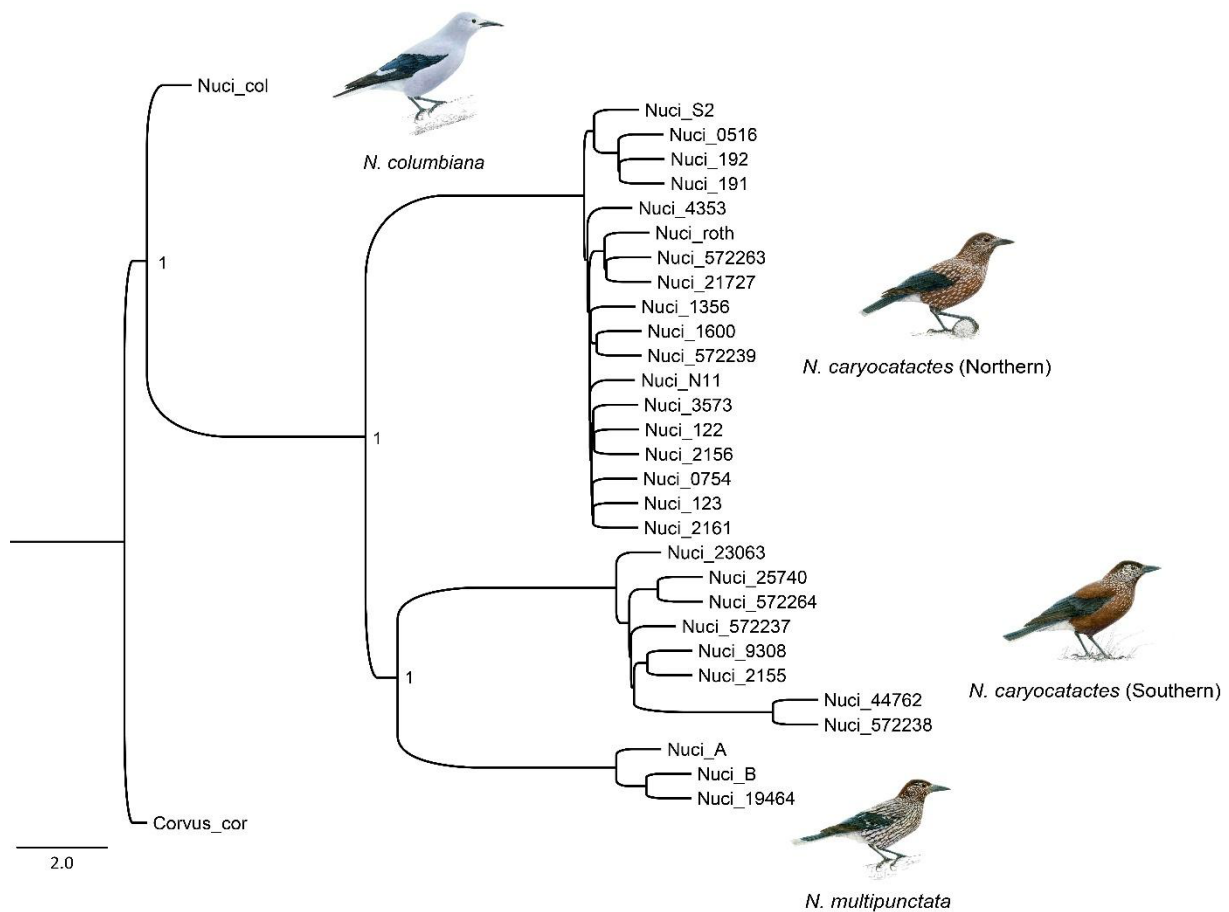

**Supplementary Figure 4. Multispecies coalescence tree based on the nuclear genome.** Species tree based on the multispecies coalescent model (MSC), using maximum likelihood trees inferred from 192 alignments of 1 Mbp of the nuclear genome. Branch lengths are in coalescence units and numbers at the nodes represent posterior probabilities. Three Eurasian nutcracker groups were identified. The Clark's nutcracker (*N. columbiana*) and Hooded Crow (*Corvus cornix*) were included as outgroups. Bird images by Jon Baldur Hlidberg, courtesy of the authors.

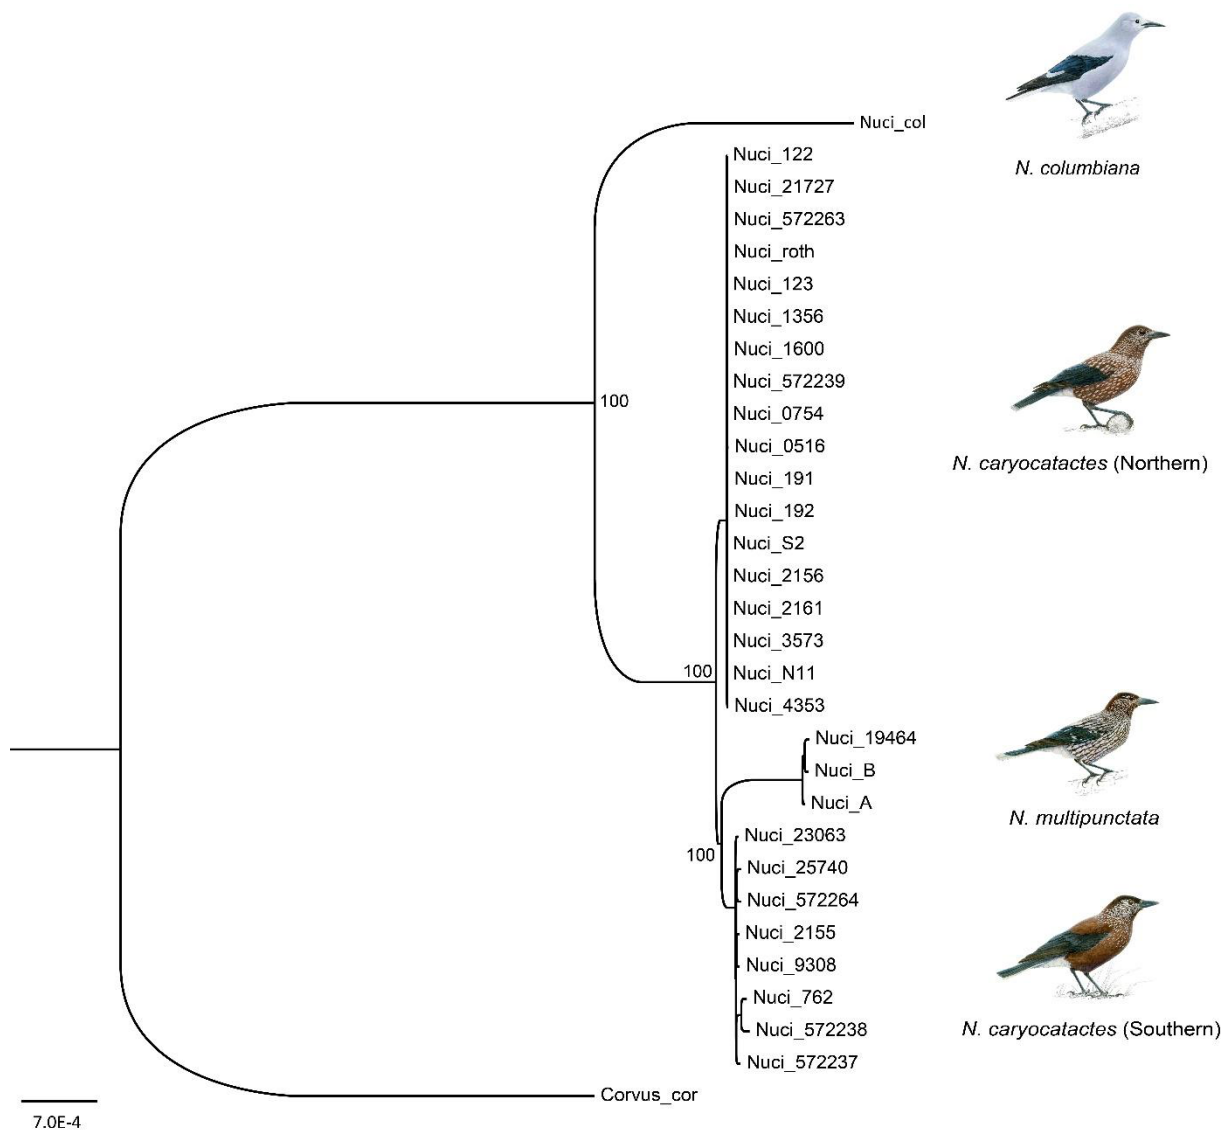

**Supplementary Figure 5. Maximum likelihood tree based on the nuclear genome.** Maximum likelihood inferences were performed based on the concatenation of 192 alignments of 1 Mbp. Three Eurasian nutcracker lineages were identified, separated by short branches. The Clark's nutcracker (*N. columbiana*) and Hooded Crow (*Corvus cornix*) were included as outgroups. Numbers at the nodes represent bootstrap support. Bird images by Jon Baldur Hlidberg, courtesy of the authors.

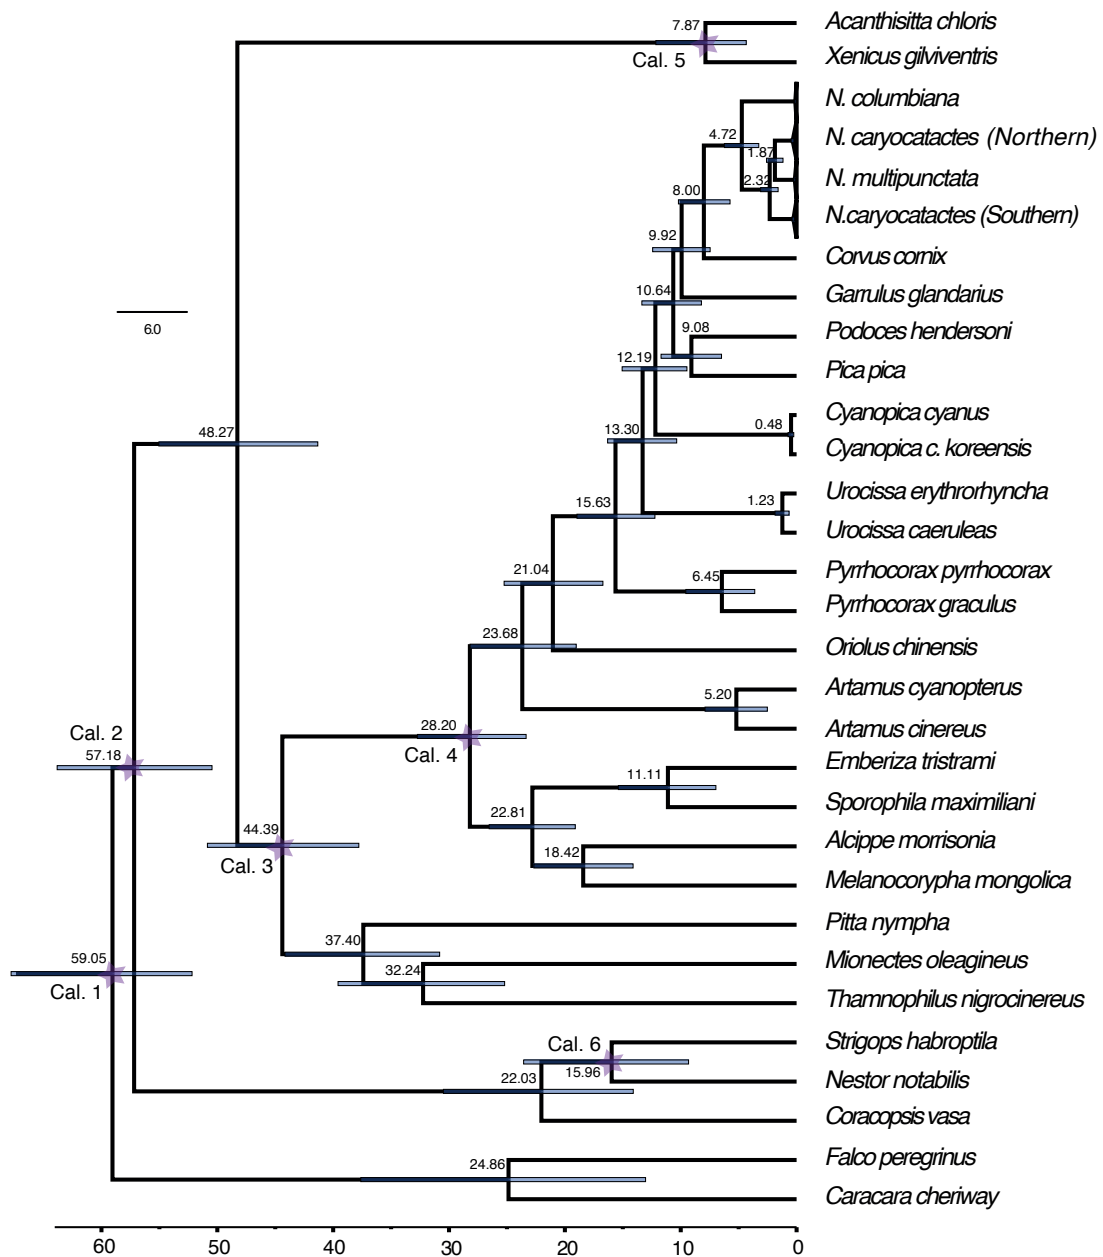

**Supplementary Figure 6. Divergence time estimation based on mitochondrial alignments.** Divergence time estimates were based on 10,851 bp protein-coding mitochondrial alignments of 59 individuals covering 31 species. The bmodeltest with a transition-transversion split was used to find a fitting substitution model. A relaxed clock log normal and a Birth-Death model was implemented. BEAST prior settings and calibration nodes (Cal. 1-Cal. 6) are provided in Supplementary Table 1. Node ages are in million years. The internal branches are collapsed within *Nucifraga*, and those divergence times are depicted in Supplementary Figure 7.



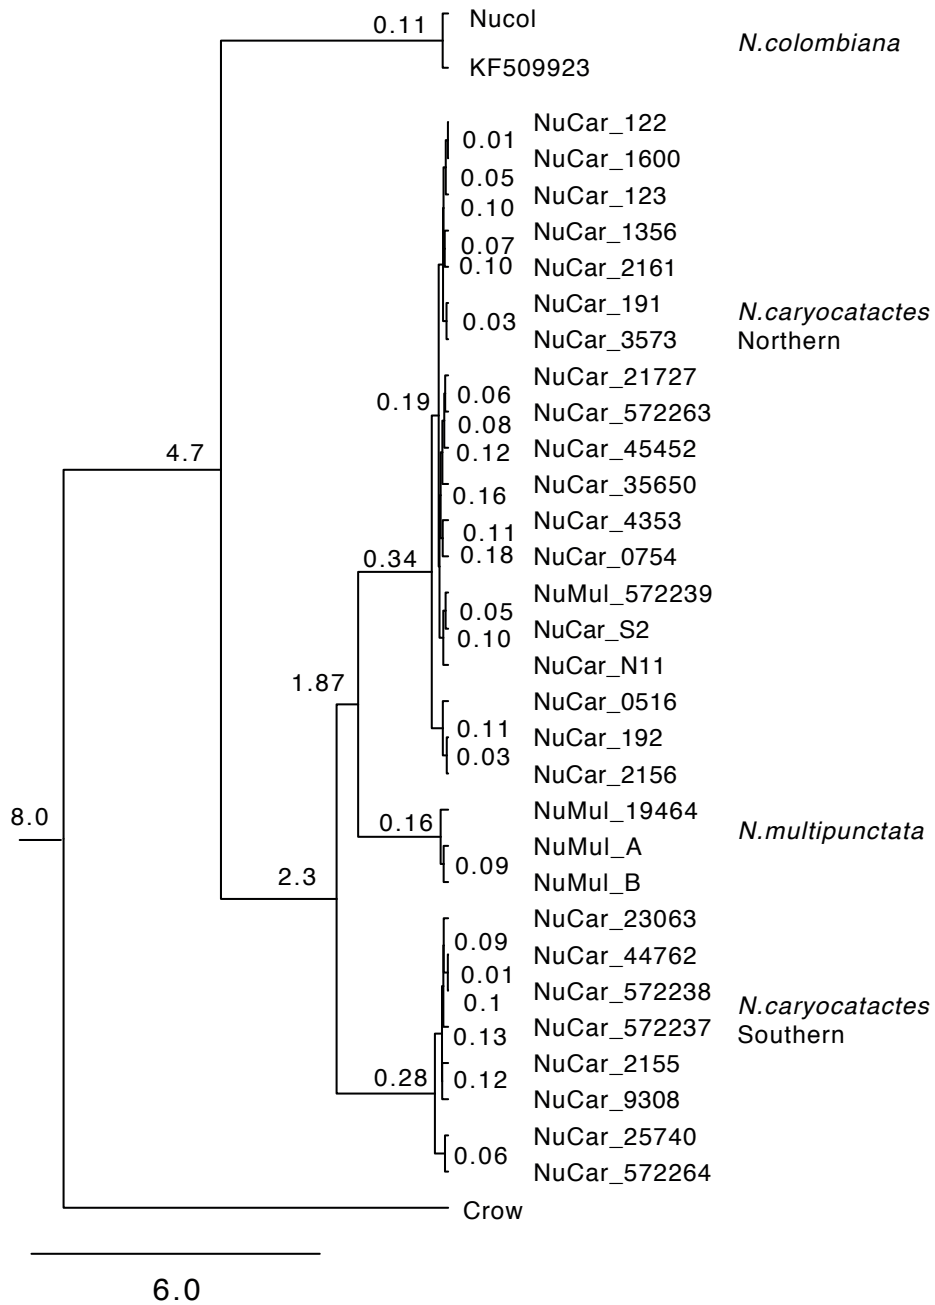

**Supplementary Figure 7. Divergence time estimates of the Eurasian nutcracker species complex based on mitochondrial alignments.** Divergence times of species and subspecies within *Nucifraga*. Analysis and phylogeny same as Supplementary Figure S6, but displaying the branches for each nutcracker individual. Numbers at the nodes reflect estimated node ages in million years.

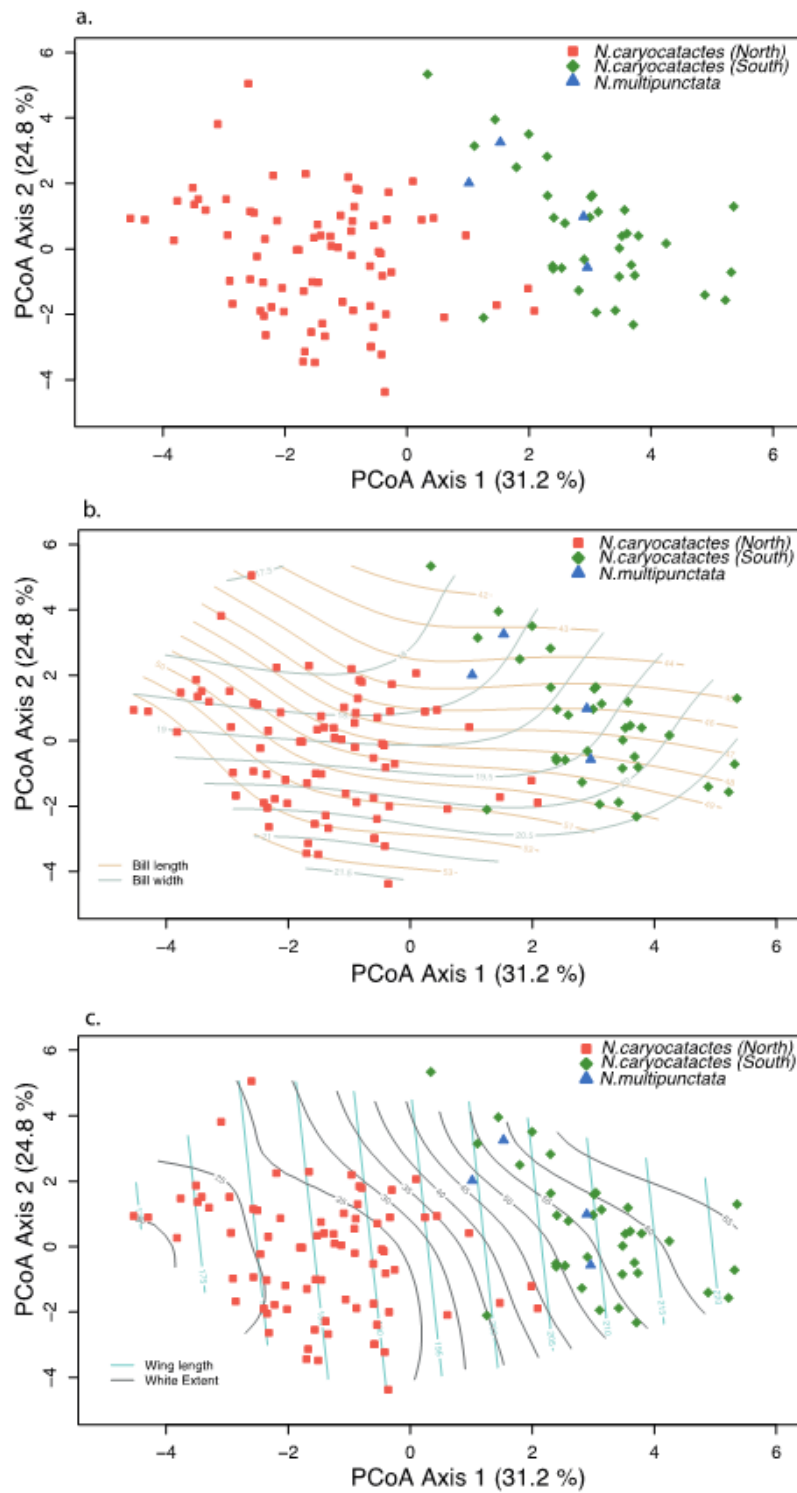

**Supplementary Figure 8. Principal coordinate analysis (PCoA) of morphometric traits.** **a.** A PCoA was performed based on 12 morphometric traits (Supplementary Table 10) to examine phenotypic variation in the dataset without a priori defined groups. **b.** Bill morphology did not contribute to the main principal components of the PCoA. **c.** wing length and white extent appear to be the main drivers of phenotypic variation between species.

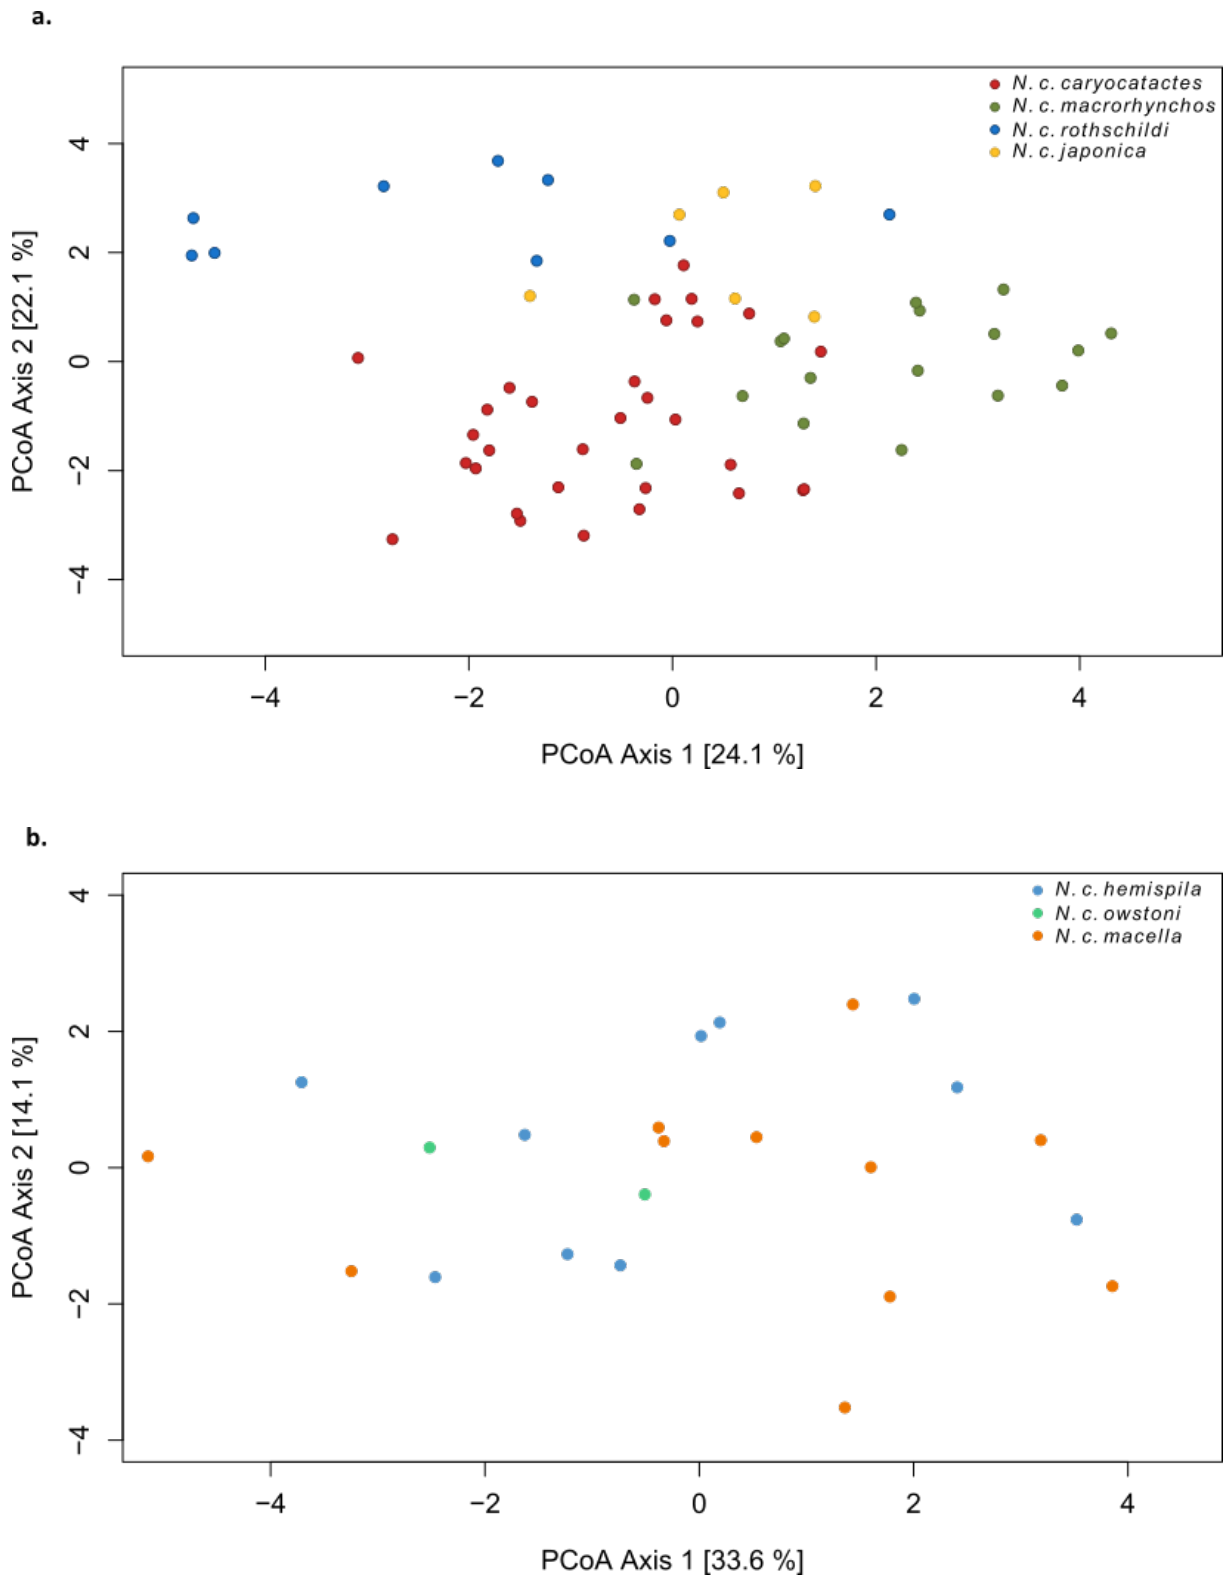

**Supplementary Figure 9. Within-species principal coordinate analysis (PCoA) of morphometric traits based on 12 morphometric traits. a.** Phenotypic variation within the northern nutcracker subspecies without a priori defined subspecies **b.** Phenotypic variation within the southern nutcracker subspecies without a priori defined subspecies.

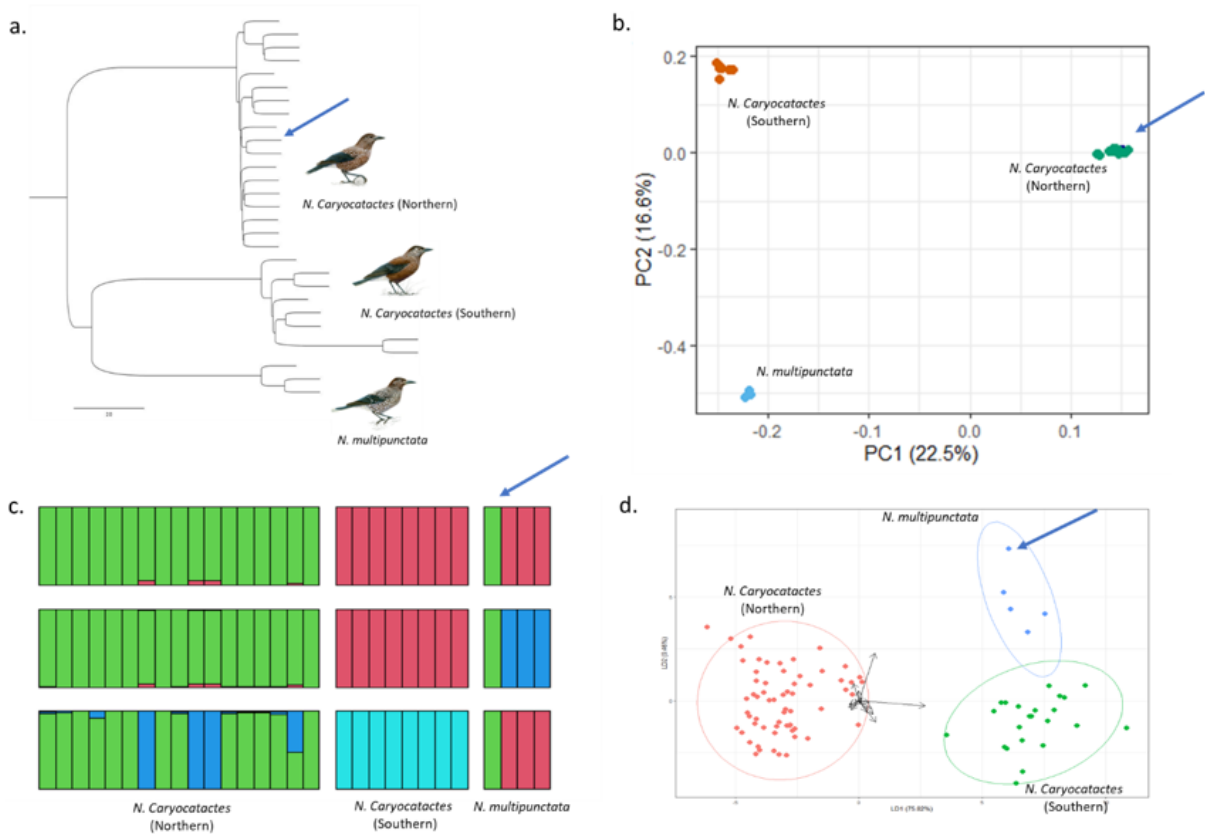

**Supplementary Figure 10. Discrepancy between morphology and genetics in one specimen.** Within our genomic dataset, one specimen of *N. multipunctata* (Nuci\_572239 – indicated with the blue arrow) had a genomic profile similar to those of *N. caryocatactes* (Northern) (a-c). However, morphological measurements confirm a phenotype similar to those of *N. multipunctata* specimens (d). Cross validation of mitochondrial control region based on additional toe-pad material from this specimen confirmed the genetic similarity to *N. caryocatactes* (northern). No clear explanation was identified for this pattern and subsequent analyses were run both including and excluding this specimen. Bird images by Jon Baldur Hlidberg, courtesy of the authors.

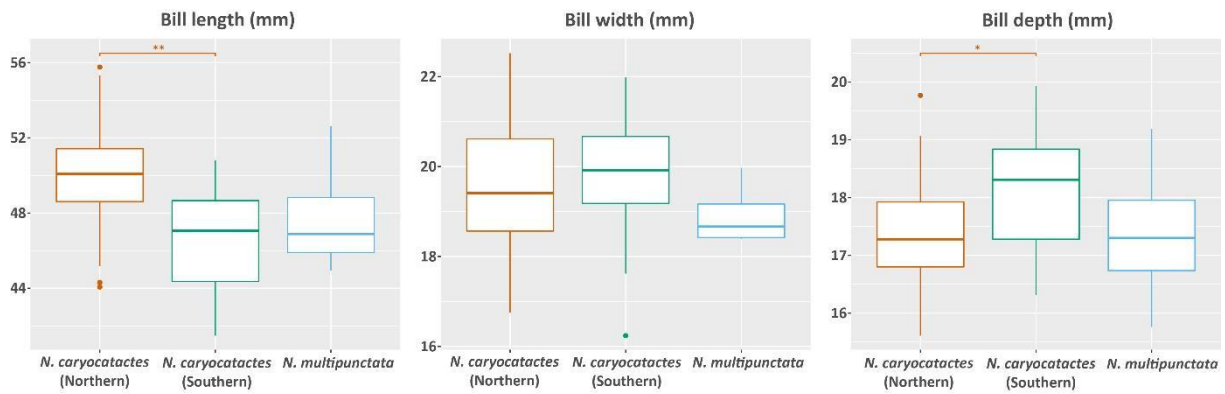

**Supplementary Figure 11. Phenotypic variation in beak morphology between nutcracker species.** Beak morphology was compared between the northern *N. caryocatactes* (N=63) group, southern *N. caryocatactes* group (N=23) and *N. multipunctata* (N=4) based on an independent morphometric dataset consisting of 90 measured museum specimens. \* = significant variation between means. \*\* = significant variation between means after Bonferroni correction.

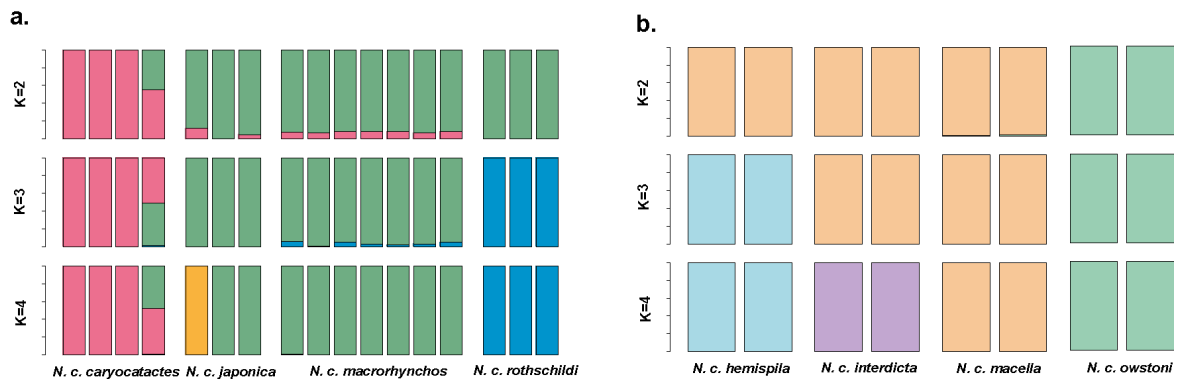

**Supplementary Figure 12. Within-species genetic variation based on admixture analyses.** **a.** Admixture analyses of the northern *N. caryocatactes* group (142,799 linkage-pruned SNPs). Each bar represents one individual. One potential F1-hybrid was identified between *N. c. caryocatactes* and *N. c. macrorhynchos* **b.** Within-species genetic variation in the southern *N. caryocatactes* group (101,611 linkage pruned SNPs). Admixture analyses for both the northern and southern nutcracker species had the lowest cross-validation error at K=2 (Supplementary Figure 2).

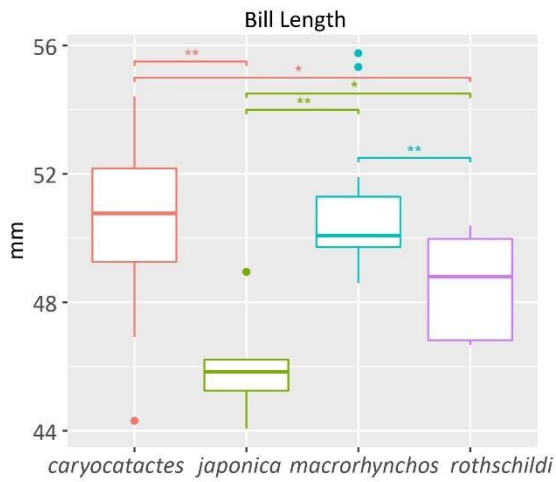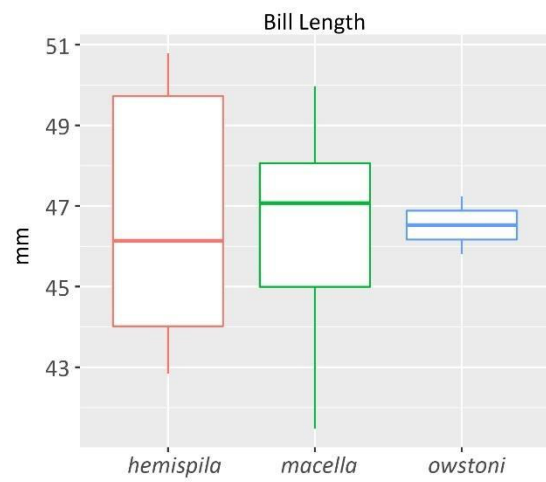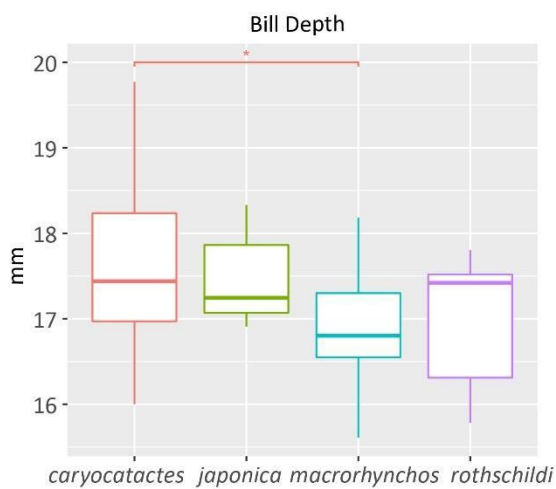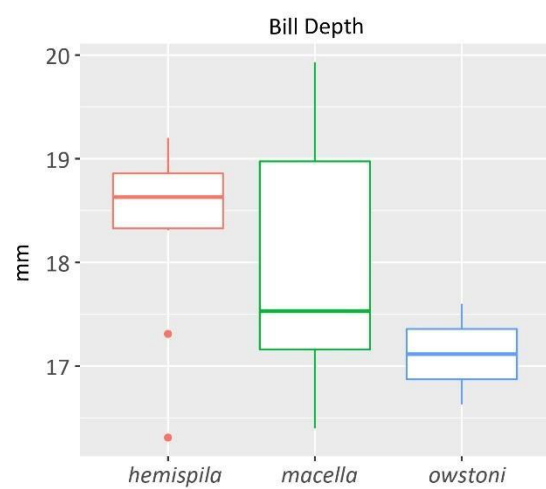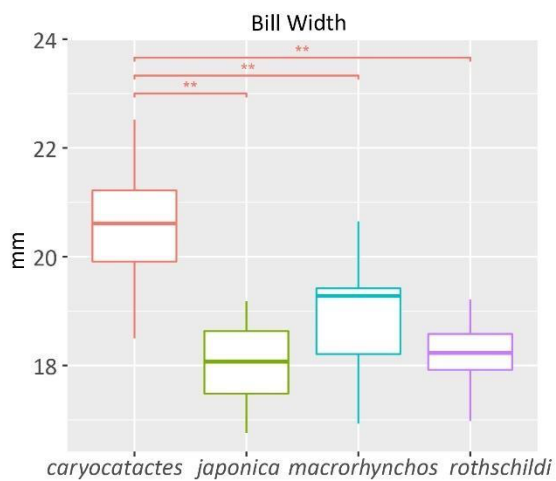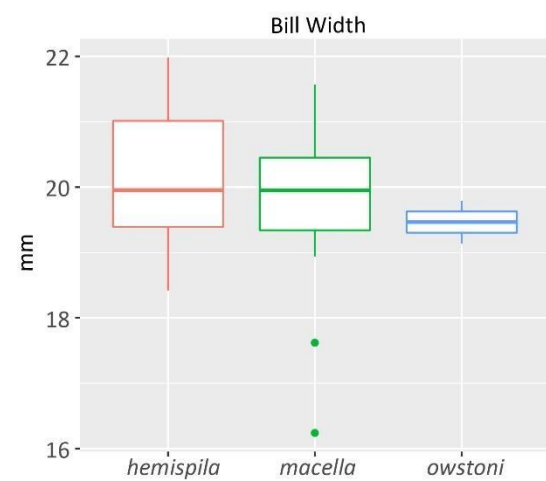

***N. caryocatactes* (Northern)**

***N. caryocatactes* (Southern)**

**Supplementary Figure 13. Phenotypic variation in beak morphology between subspecies.** Morphometric measurements of beak morphology per subspecies. *N. c. caryocatactes* (N=31), *N. c. macrorhynchos* (N=17), *N. c. rothschildi* (N=9), *N. c. japonica* (N=6), *N. c. hemispila* (N=11), *N. c. macella* (N=10) and *N. c. owstoni* (N=2). \* = Significant variation between means. \*\* = significant variation between means after Bonferroni correction.

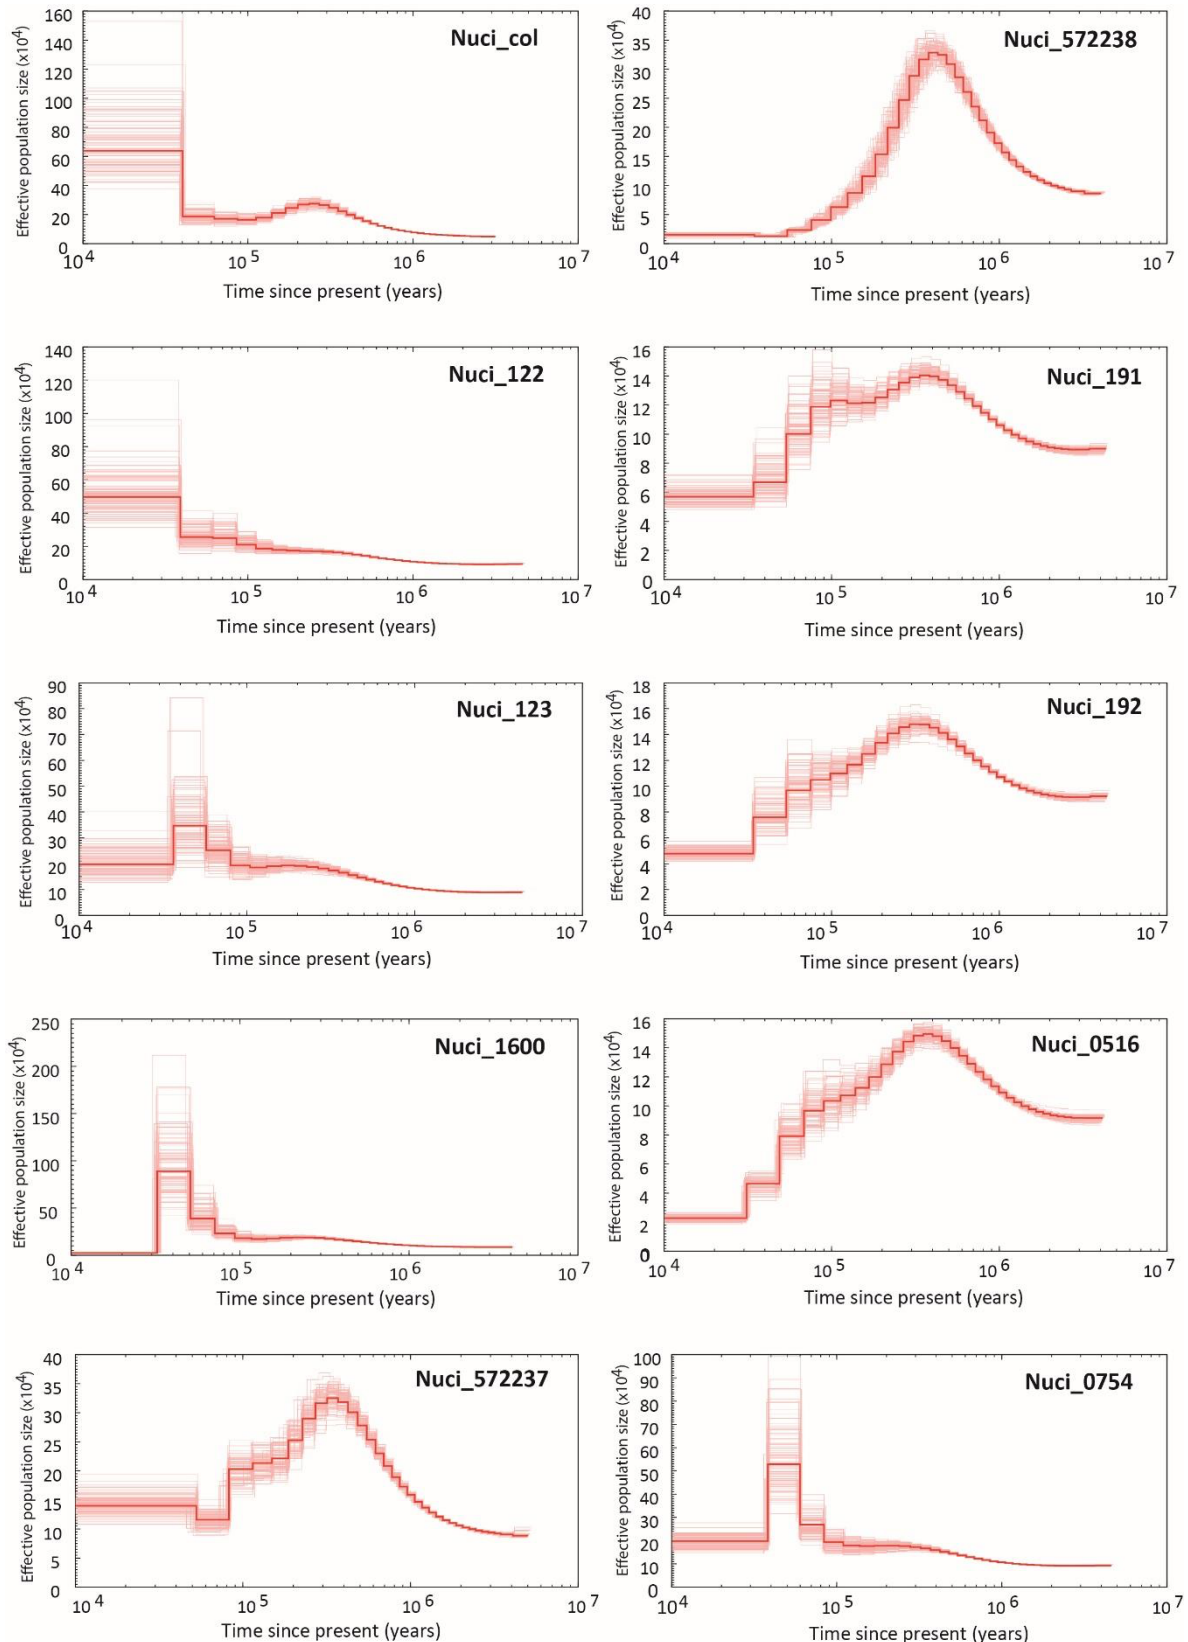

**Supplementary Figure 14. Reconstruction of demographic history (PSMC).** PSMC plots visualized per individual. Only those individuals with a minimum coverage of 17X are included, as recommended in Nadachowska-Brzyska et al.<sup>1</sup>. PSMC was run for 25 iterations with the upper limit of the TMRCA set to  $-t$  5, the initial  $h/q$  value to  $-r$  1, and 34 atomic time intervals ( $4+30*2+4+6+10$ ). A mutation rate ( $\mu$ ) of  $3.18 \times 10^{-9}$  substitutions per generation was used<sup>2</sup> and a generation time ( $g$ ) of 7 years<sup>3</sup>.



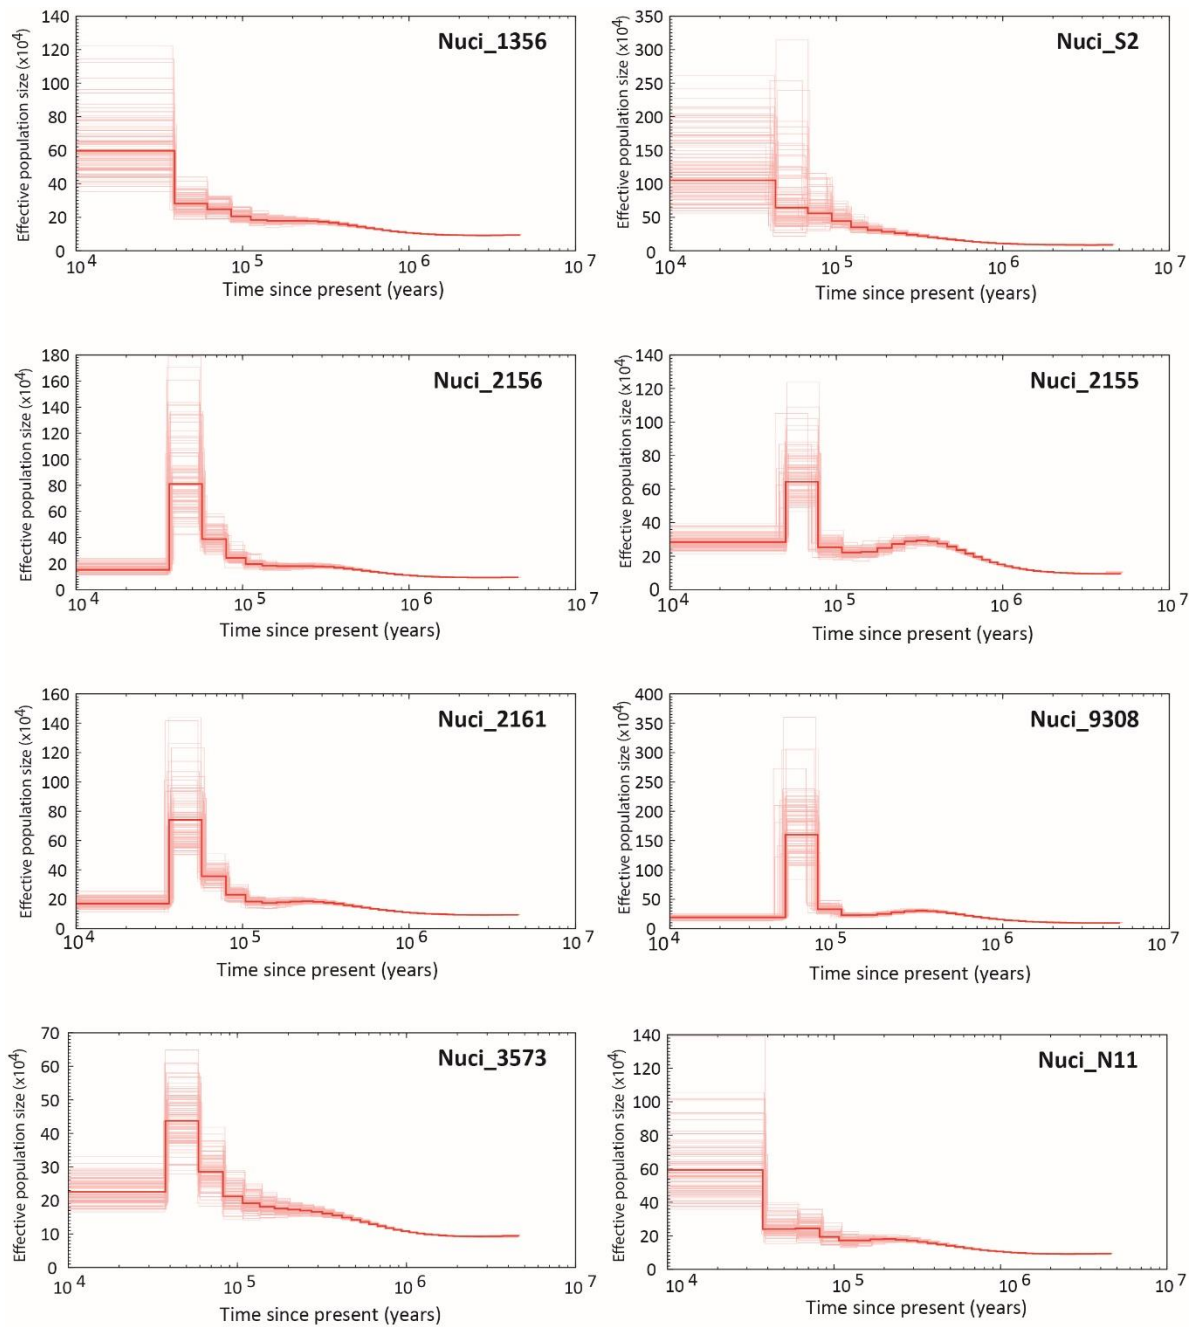

**Supplementary Figure 14 (continued). Reconstruction of demographic history (PSMC).** PSMC plots visualized per individual. Only those individuals with a minimum coverage of 17X are included, as recommended in Nadachowska-Brzyska et al.<sup>1</sup> PSMC was run for 25 iterations with the upper limit of the TMRCA set to  $-t_5$ , the initial  $h/q$  value to  $-r_1$ , and 34 atomic time intervals ( $4+30*2+4+6+10$ ). A mutation rate ( $\mu$ ) of  $3.18 \times 10^{-9}$  substitutions per generation was used<sup>2</sup> and a generation time ( $g$ ) of 7 years<sup>3</sup>.

a.

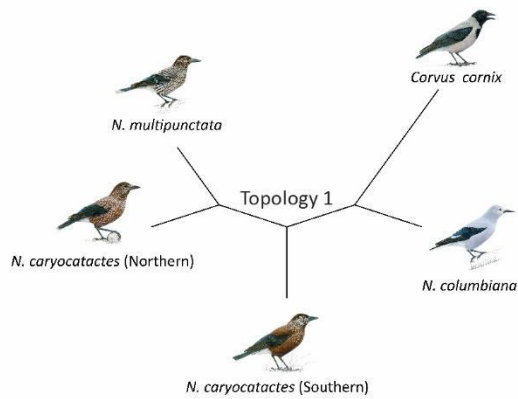

b.

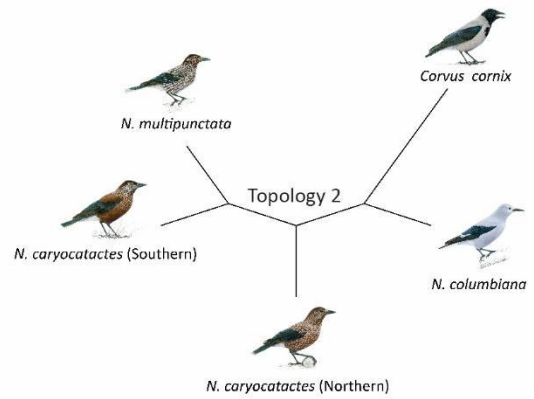

c.

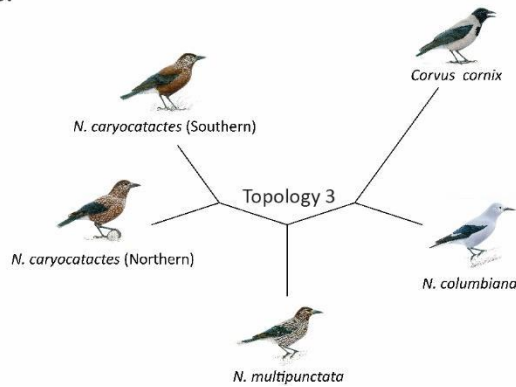

**Supplementary Figure 15. Possible topologies for the nutcracker species complex.** a. *N. multipunctata* and *N. caryocatactes* (Northern) form a sister group to *N. caryocatactes* (Southern). b. *N. multipunctata* and *N. caryocatactes* (Southern) form a sister group to *N. caryocatactes* (Northern). c. Both the northern and southern *N. caryocatactes* groups form a sister group to *N. multipunctata*. Topologies were evaluated with the approximate unbiased test (AU-test) to determine whether alternative topologies could be rejected (Supplementary Figure 16). Bird images by Jon Baldur Hlidberg, courtesy of the authors.

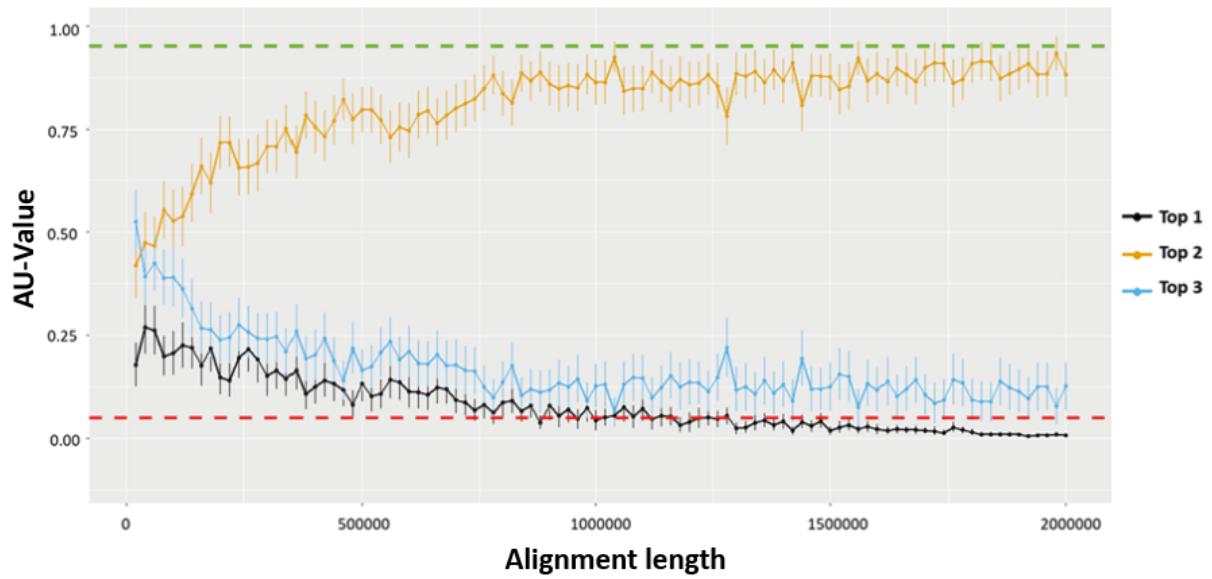

**Supplementary Figure 16. Approximate unbiased test for phylogenetic inference.** An approximate unbiased test was performed on increasing genome alignment lengths to infer the minimum alignment length needed for accurate phylogenetic inference. The X-axis represents the increase in window size whereas the Y-axis shows the corresponding mean AU-score for the window length. Increasing the window length reveals that topology 1 (black line, Supplementary Figure 15a) could significantly be rejected at an alignment length of >1 Mbp, reaching an AU-value of < 0.05. The second topology (Supplementary Figure 15b) seems to be the most likely (orange line), but never reaches the significant threshold of >0.95.

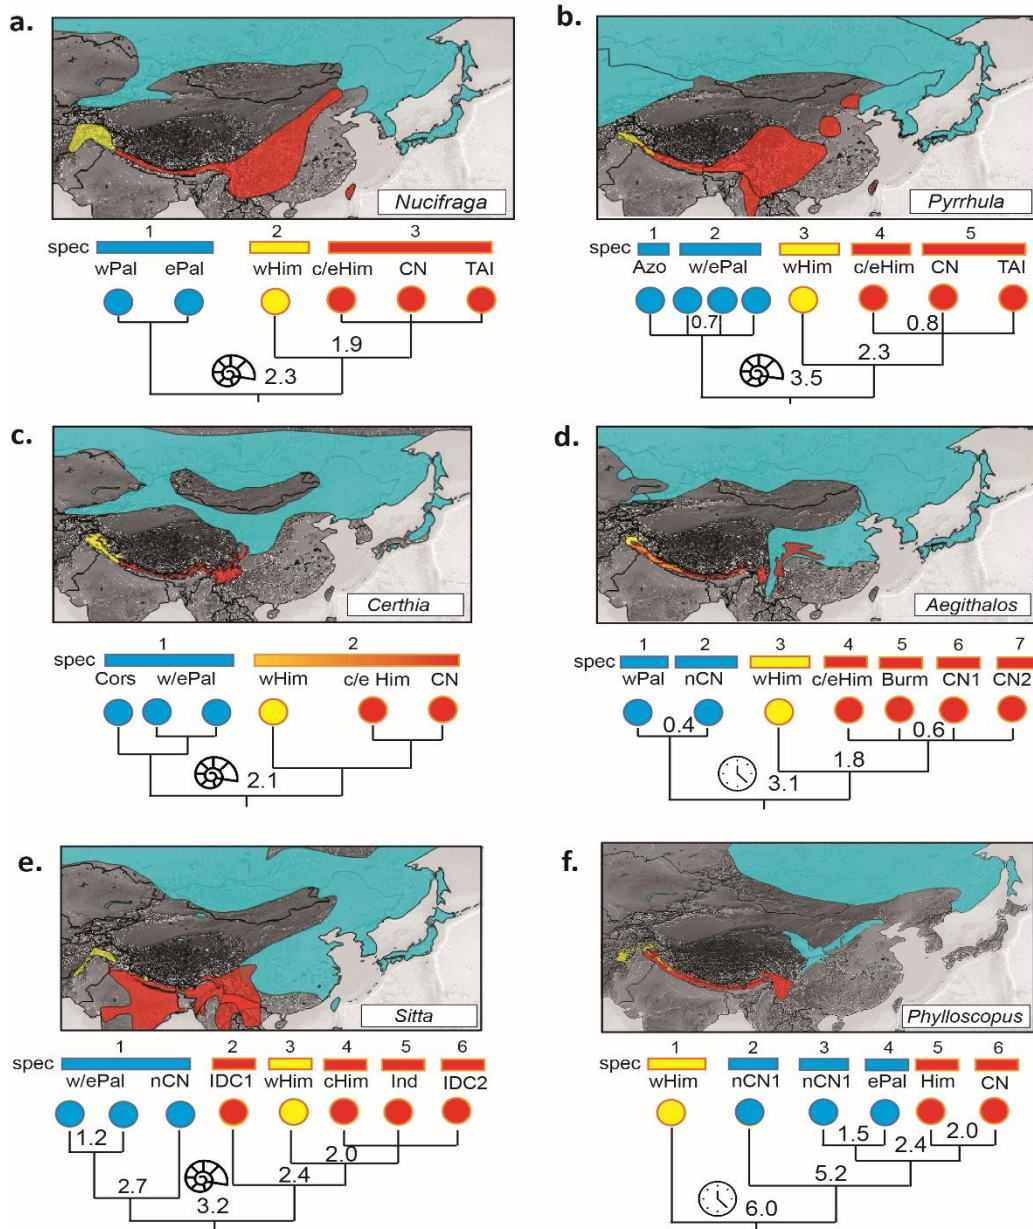

**Supplementary Figure 17. Similarity in phylogeographic and divergence patterns of Sino-Himalayan passerines.**

Comparison of the nutcracker diversification compared to other non-mutualistic Sino-Himalayan passerine birds occurring in the same region. **a.** nutcrackers, *Nucifraga*: 1= *N. caryocatactes*, 2= *N. hemispila*, 3= *N. multipunctata*; **b.** bullfinches, *Pyrrhula*: 1= *P. murina*, 2= *P. pyrrhula*, 3= *P. aurantiaca*, 4= *P. erythrocephala*, 5= *P. erythaca*<sup>4</sup> **c.** treecreepers, *Certhia*: 1= *Certhia familiaris*, 2= *Certhia hodgsoni*<sup>5</sup> **d.** bushtits, *Aegithalos*: 1= *Ae. caudatus*, 2= *Ae. glaucogularis*, 3= *Ae. niveogularis*, 4= *Ae. iouschistos*, 5= *Ae. sharpei*, 6= *Ae. bonvaloti*, 7= *Ae. fuliginosus*<sup>5</sup> **e.** nuthatches, *Sitta*: 1= *S. europaea*, 2= *S. nagaensis*, 3= *S. cashmirensis*, 4= *S. cinnamoventris*, 5= *S. castanea*, 6= *S. neglecta*<sup>6</sup> **f.** leaf warblers, *Phylloscopus*: 1= *P. subviridis*, 2= *P. yunnanensis*, 3= *P. kansuensis*, 4= *P. proregulus*, 5= *P. chloronotus*, 6= *P. forresti*<sup>7</sup>. Mean divergence time estimates (in Myr) indicated at nodes. Shells indicate use of fossils in calibration whereas clocks indicate fixed mtDNA rates. Distribution maps according to BirdLife International<sup>3</sup>. Abbreviations: n/e/s/w= northern/eastern/southern/western, Pal= Palearctic, Azo=Azores, Cors= Corsica, CN= China, Him= Himalayas, Burm= Myanmar, Ind= India, IDC= Indochina, TAI= Taiwan.

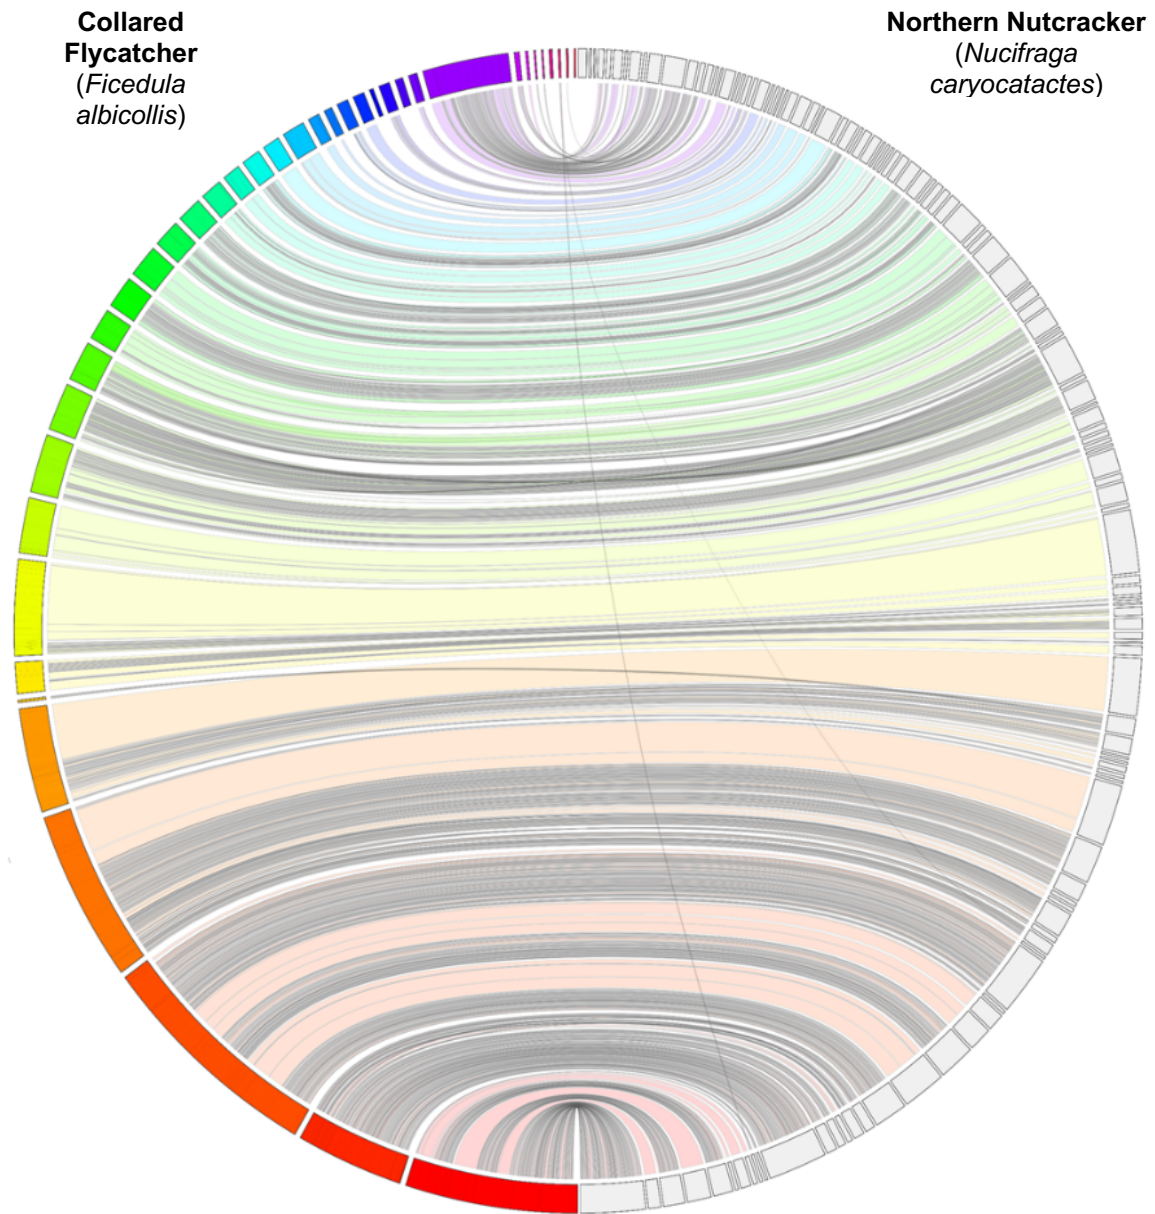

**Supplementary Figure 18. Synteny between the assembled nutcracker genome and chromosome level flycatcher genome.** Syntenic plot visualizing the concordance between the assembled *Nucifraga caryocatactes* genome (right) and the chromosome level Collared Flycatcher (*Ficedula albicollis*) genome (left).

**Supplementary Table 1. Calibration points used for molecular dating and tMRCA prior settings in BEAST.** Five lognormal priors were included based on previously published fossil and divergence data. Prior mean and standard deviation were set to cover the interval of the fossil age range.

| Calibration node | node dated                            | type   | date (Ma)  | offset | mean | sd   | reference                    |
|------------------|---------------------------------------|--------|------------|--------|------|------|------------------------------|
| 1                | Root (Falconiformes)                  | Normal | 52-62      | 0.0    | 59.1 | 3.8  | Oliveros et al. <sup>8</sup> |
| 2                | Psittaciformes vs Passeriformes       | normal | 51.81-66.5 | 0.0    | 41   | 13.0 | Oliveros et al. <sup>8</sup> |
| 3                | oscines vs suboscines                 | normal | 27.52-56.0 | 0.0    | 42.0 | 8.0  | Oliveros et al. <sup>8</sup> |
| 4                | Corvides vs Passerides                | normal | 17–26      | 0.0    | 21   | 2.45 | Jarvis et al. <sup>9</sup>   |
| 5                | <i>Acanthisitta</i> vs <i>Xenicus</i> | normal | 15.9-56.0  | 0.0    | 36   | 10.2 | Oliveros et al. <sup>8</sup> |

**Supplementary Table 2. Measurements and comparisons of morphometric traits for the three main *Nucifraga* groups.** Summary statistics of the primary traits identified in the LDA are shown on the left, whereas statistical comparisons using Welch's t-test are presented on the right. Double asterix represent significant variation after Bonferroni correction ( $p \leq 0.008$ ).

| Wing length                        |    |        |        | Welch's t-test                     |                                    |                                    |                         |
|------------------------------------|----|--------|--------|------------------------------------|------------------------------------|------------------------------------|-------------------------|
| Species                            | n  | mean   | st.dev |                                    | <i>N. caryocatactes</i> (Northern) | <i>N. caryocatactes</i> (Southern) | <i>N. multipunctata</i> |
| <i>N. caryocatactes</i> (Northern) | 63 | 185.64 | 8.49   | <i>N. caryocatactes</i> (Northern) | -                                  |                                    |                         |
| <i>N. caryocatactes</i> (Southern) | 23 | 210.27 | 8.91   | <i>N. caryocatactes</i> (Southern) | **                                 | -                                  |                         |
| <i>N. multipunctata</i>            | 4  | 211.52 | 5.20   | <i>N. multipunctata</i>            | **                                 | n.s.                               | -                       |
|                                    |    |        |        |                                    |                                    |                                    |                         |
| Tail length                        |    |        |        | Welch's t-test                     |                                    |                                    |                         |
| Species                            | n  | mean   | st.dev |                                    | <i>N. caryocatactes</i> (Northern) | <i>N. caryocatactes</i> (Southern) | <i>N. multipunctata</i> |
| <i>N. caryocatactes</i> (Northern) | 63 | 124.38 | 6.15   | <i>N. caryocatactes</i> (Northern) | -                                  |                                    |                         |
| <i>N. caryocatactes</i> (Southern) | 23 | 140.12 | 7.42   | <i>N. caryocatactes</i> (Southern) | **                                 | -                                  |                         |
| <i>N. multipunctata</i>            | 4  | 155.63 | 6.13   | <i>N. multipunctata</i>            | **                                 | **                                 | -                       |
|                                    |    |        |        |                                    |                                    |                                    |                         |
| White extent                       |    |        |        | Welch's t-test                     |                                    |                                    |                         |
| Species                            | n  | mean   | st.dev |                                    | <i>N. caryocatactes</i> (Northern) | <i>N. caryocatactes</i> (Southern) | <i>N. multipunctata</i> |
| <i>N. caryocatactes</i> (Northern) | 63 | 23.54  | 4.17   | <i>N. caryocatactes</i> (Northern) | -                                  |                                    |                         |
| <i>N. caryocatactes</i> (Southern) | 23 | 59.22  | 9.51   | <i>N. caryocatactes</i> (Southern) | **                                 | -                                  |                         |
| <i>N. multipunctata</i>            | 4  | 56.37  | 5.20   | <i>N. multipunctata</i>            | **                                 | n.s.                               | -                       |

**Supplementary Table 3. Measurements and comparisons of morphometric traits within the Northern *N. caryocatactes* group.** Summary statistics of the primary traits identified in the LDA are shown on the left, whereas statistical comparisons using Welch's t-test are presented on the right. Asterix represents significant variation ( $p \leq 0.05$ ), whereas double asterix represent significant variation after Bonferroni correction ( $p \leq 0.008$ ).

| Wing length                |    |        |        | Welch's t-test             |                            |                            |                          |                       |
|----------------------------|----|--------|--------|----------------------------|----------------------------|----------------------------|--------------------------|-----------------------|
| Subspecies                 | n  | mean   | st.dev |                            | <i>N. c. caryocatactes</i> | <i>N. c. macrorhynchos</i> | <i>N. c. rothschildi</i> | <i>N. c. japonica</i> |
| <i>N. c. caryocatactes</i> | 31 | 184.57 | 5.24   | <i>N. c. caryocatactes</i> | -                          |                            |                          |                       |
| <i>N. c. macrorhynchos</i> | 17 | 179.4  | 4.99   | <i>N. c. macrorhynchos</i> | **                         | -                          |                          |                       |
| <i>N. c. rothschildi</i>   | 9  | 200.23 | 4.8    | <i>N. c. rothschildi</i>   | **                         | **                         | -                        |                       |
| <i>N. c. japonica</i>      | 6  | 187    | 9.41   | <i>N. c. japonica</i>      | n.s.                       | n.s.                       | *                        | -                     |
|                            |    |        |        |                            |                            |                            |                          |                       |
| White extent               |    |        |        | Welch's t-test             |                            |                            |                          |                       |
| Subspecies                 | n  | mean   | st.dev |                            | <i>N. c. caryocatactes</i> | <i>N. c. macrorhynchos</i> | <i>N. c. rothschildi</i> | <i>N. c. japonica</i> |
| <i>N. c. caryocatactes</i> | 31 | 21.82  | 3.55   | <i>N. c. caryocatactes</i> | -                          |                            |                          |                       |
| <i>N. c. macrorhynchos</i> | 17 | 26.71  | 4.27   | <i>N. c. macrorhynchos</i> | **                         | -                          |                          |                       |
| <i>N. c. rothschildi</i>   | 9  | 23.05  | 2.55   | <i>N. c. rothschildi</i>   | n.s.                       | *                          | -                        |                       |
| <i>N. c. japonica</i>      | 6  | 24.25  | 4.26   | <i>N. c. japonica</i>      | n.s.                       | n.s.                       | n.s.                     | -                     |
|                            |    |        |        |                            |                            |                            |                          |                       |
| Tail length                |    |        |        | Welch's t-test             |                            |                            |                          |                       |
| Subspecies                 | n  | mean   | st.dev |                            | <i>N. c. caryocatactes</i> | <i>N. c. macrorhynchos</i> | <i>N. c. rothschildi</i> | <i>N. c. japonica</i> |
| <i>N. c. caryocatactes</i> | 31 | 122.52 | 3.56   | <i>N. c. caryocatactes</i> | -                          |                            |                          |                       |
| <i>N. c. macrorhynchos</i> | 17 | 120.76 | 3.12   | <i>N. c. macrorhynchos</i> | n.s.                       | -                          |                          |                       |
| <i>N. c. rothschildi</i>   | 9  | 135.94 | 4.79   | <i>N. c. rothschildi</i>   | **                         | **                         | -                        |                       |
| <i>N. c. japonica</i>      | 6  | 127.00 | 3.22   | <i>N. c. japonica</i>      | *                          | **                         | **                       | -                     |



**Supplementary Table 4. Measurements and comparisons of morphometric traits within the Southern *N. caryocatactes* group.** Summary statistics are shown on the left, whereas statistical comparisons using Welch's t-test are presented on the right. Statistical testing for the *N. c. owstoni* subspecies could not be performed due to the small sample size (n=2).

| <b>Wing length</b>     |          |             |               | <b>Welch's t-test</b> |                        |                        |                      |  |
|------------------------|----------|-------------|---------------|-----------------------|------------------------|------------------------|----------------------|--|
| <b>Subspecies</b>      | <b>n</b> | <b>mean</b> | <b>st.dev</b> |                       | <i>N. c. macella</i>   | <i>N. c. hemispila</i> | <i>N. c. owstoni</i> |  |
| <i>N. c. macella</i>   | 11       | 214.18      | 9.75          |                       | <i>N. c. macella</i>   | -                      |                      |  |
| <i>N. c. hemispila</i> | 10       | 207.77      | 6.45          |                       | <i>N. c. hemispila</i> | n.s.                   | -                    |  |
| <i>N. c. owstoni</i>   | 2        | 201.25      | 5.30          |                       | <i>N. c. owstoni</i>   | N/A                    | N/A                  |  |
|                        |          |             |               |                       |                        |                        |                      |  |
| <b>Distal distance</b> |          |             |               | <b>Welch's t-test</b> |                        |                        |                      |  |
| <b>Subspecies</b>      | <b>n</b> | <b>mean</b> | <b>st.dev</b> |                       | <i>N. c. macella</i>   | <i>N. c. hemispila</i> | <i>N. c. owstoni</i> |  |
| <i>N. c. macella</i>   | 11       | 88.95       | 7.74          |                       | <i>N. c. macella</i>   | -                      |                      |  |
| <i>N. c. hemispila</i> | 10       | 85.5        | 5.7           |                       | <i>N. c. hemispila</i> | n.s.                   | -                    |  |
| <i>N. c. owstoni</i>   | 2        | 82.5        | 0.70          |                       | <i>N. c. owstoni</i>   | N/A                    | N/A                  |  |
|                        |          |             |               |                       |                        |                        |                      |  |
| <b>Bill length</b>     |          |             |               | <b>Welch's t-test</b> |                        |                        |                      |  |
| <b>Subspecies</b>      | <b>n</b> | <b>mean</b> | <b>st.dev</b> |                       | <i>N. c. macella</i>   | <i>N. c. hemispila</i> | <i>N. c. owstoni</i> |  |
| <i>N. c. macella</i>   | 11       | 46.35       | 2.66          |                       | <i>N. c. macella</i>   | -                      |                      |  |
| <i>N. c. hemispila</i> | 10       | 46.75       | 3.18          |                       | <i>N. c. hemispila</i> | n.s.                   | -                    |  |
| <i>N. c. owstoni</i>   | 2        | 46.52       | 1.00          |                       | <i>N. c. owstoni</i>   | N/A                    | N/A                  |  |

Supplementary Table 5. *Nucifraga* genome assembly summary statistics

| <i>Assembly statistic</i>               | <i>Nucifraga</i> |
|-----------------------------------------|------------------|
| Number of contigs/scaffolds             | 12,498           |
| Assembly length                         | 1,144,305,354    |
| Number of contigs/scaffolds (> 100 kbp) | 294              |
| Assembly length (> 100kbp)              | 1,076,014,238    |
| Largest scaffold                        | 45.16 Mbp        |
| Contig N50                              | 217.12 Kbp       |
| Scaffold N50                            | 12.61 Mbp        |
| Scaffold L50                            | 24               |

**Supplementary Table 6. Repeat content of the de novo assembled *Nucifraga* genome.**

| <b>TE</b>              | <b>Copy Number</b> | <b>Length</b> | <b>Percentage of assembly</b> |
|------------------------|--------------------|---------------|-------------------------------|
| <b>SINEs</b>           | 7,762              | 914,050       | 0.08%                         |
| <b>LINEs</b>           | 157,615            | 38,193,048    | 3.55%                         |
| <b>LTR elements</b>    | 83,482             | 45,888,286    | 4.26%                         |
| <b>DNA transposons</b> | 5,761              | 779,916       | 0.07%                         |
| <b>Unclassified</b>    | 12,519             | 2,176,130     | 0.20%                         |
| <b>Small RNA</b>       | 598                | 57,527        | 0.00%                         |
| <b>Satellites</b>      | 2,227              | 715,425       | 0.07%                         |
| <b>Simple repeats</b>  | 207,429            | 8,726,825     | 0.81%                         |
| <b>Low complexity</b>  | 42,608             | 2,166,229     | 0.20%                         |
|                        |                    | <b>Total:</b> | 9.23%                         |

**Supplementary Table 7. Sample collection information.** Abbreviations of collections refer to: **ZMMU** = Zoological Museum of Moscow University, **NRM** = Natural History Museum of Sweden, **OLML** = Oberösterreichisches Landesmuseum of Linz, **YIO** = Yamashina Institute for Ornithology, **SNSD** = Senckenberg Natural History Collections of Dresden, **NHMO** = Natural History Museum of Norway, **NHMD** = Natural History Museum of Denmark, **MFNB** = Museum für Naturkunde Berlin, **RAM** = Royal Alberta Museum.

| Genus            | Species              | Subspecies           | Collection | sample ID | Voucher No.       | Sample type | Sampling location                 |
|------------------|----------------------|----------------------|------------|-----------|-------------------|-------------|-----------------------------------|
| <i>Nucifraga</i> | <i>caryocatactes</i> | <i>caryocatactes</i> | ZMMU       | Nuci_0516 | MVK 430           | Tissue      | Moscow obl.                       |
| <i>Nucifraga</i> | <i>caryocatactes</i> | <i>caryocatactes</i> | NRM        | Nuci_S2   | 976416            | Tissue      | Björkö-Arholma                    |
| <i>Nucifraga</i> | <i>caryocatactes</i> | <i>caryocatactes</i> | OLML       | Nuci_191  | OLML 2017/191     | Tissue      | Steiermark<br>Möderbrugg          |
| <i>Nucifraga</i> | <i>caryocatactes</i> | <i>caryocatactes</i> | OLML       | Nuci_192  | OLML 2017/192     | Tissue      | Oberösterreich<br>Windischgarsten |
| <i>Nucifraga</i> | <i>caryocatactes</i> | <i>japonica</i>      | YIO        | Nuci_1600 | 2017-1600         | Muscle      | Hokkaido                          |
| <i>Nucifraga</i> | <i>caryocatactes</i> | <i>japonica</i>      | SNSD       | Nuci_4353 | MTD-C4353         | Skin        | Honshu Island                     |
| <i>Nucifraga</i> | <i>caryocatactes</i> | <i>japonica</i>      | ZMMU       | Nuci_0754 | RYA 1560          | Tissue      | Kuril Island                      |
| <i>Nucifraga</i> | <i>caryocatactes</i> | <i>macrorhynchos</i> | ZMMU       | Nuci_3573 | RYA 3573          | Tissue      | Kamchatka                         |
| <i>Nucifraga</i> | <i>caryocatactes</i> | <i>macrorhynchos</i> | NHMO       | Nuci_N11  | NHMO-BI-39155/1-B | Blood       | Björkö-Arholma                    |
| <i>Nucifraga</i> | <i>caryocatactes</i> | <i>macrorhynchos</i> | ZMMU       | Nuci_1356 | RYA 2655          | Tissue      | Sakhalin                          |
| <i>Nucifraga</i> | <i>caryocatactes</i> | <i>macrorhynchos</i> | ZMMU       | Nuci_2161 | SAP 624           | Tissue      | Kaliningrad obl.                  |
| <i>Nucifraga</i> | <i>caryocatactes</i> | <i>macrorhynchos</i> | ZMMU       | Nuci_2156 | NIA 629           | Tissue      | Krasnodar krai                    |
| <i>Nucifraga</i> | <i>caryocatactes</i> | <i>macrorhynchos</i> | NHMD       | Nuci_122  | 116122            | Tissue      | Altay Mountain Region             |
| <i>Nucifraga</i> | <i>caryocatactes</i> | <i>macrorhynchos</i> | NHMD       | Nuci_123  | 116123            | Tissue      | Altay Mountain Region             |

**Supplementary Table 7 (continued). Sample collection information.** Abbreviations of collections refer to: **ZMMU** = Zoological Museum of Moscow University, **NRM** = Natural History Museum of Sweden, **OLML** = Oberösterreichisches Landesmuseum of Linz , **YIO** = Yamashina Institute for Ornithology, **SNSD** = Senckenberg Natural History Collections of Dresden, **NHMO** = Natural History Museum of Norway, **NHMD** = Natural History Museum of Denmark, **MFNB** = Museum für Naturkunde Berlin, **RAM** = Royal Alberta Museum.

| Genus            | Species              | Subspecies         | Collection                    | sample ID   | Voucher No. | Sample type | Sampling location |
|------------------|----------------------|--------------------|-------------------------------|-------------|-------------|-------------|-------------------|
| <i>Nucifraga</i> | <i>caryocatactes</i> | <i>rothschildi</i> | MFNB                          | Nuci_roth   | -           | Skin        | Aksu              |
| <i>Nucifraga</i> | <i>caryocatactes</i> | <i>rothschildi</i> | SNSD                          | Nuci_21727  | MTD-C21727  | Skin        | Naryn             |
| <i>Nucifraga</i> | <i>caryocatactes</i> | <i>rothschildi</i> | NRM                           | Nuci_572263 | NRM572263   | Skin        | Chan-tengri       |
| <i>Nucifraga</i> | <i>columbiana</i>    |                    | RAM                           | Nuci_col    | Z17.8.23    | Skin        | Kootenay Plains   |
| <i>Nucifraga</i> | <i>caryocatactes</i> | <i>hemispila</i>   | SNSD                          | Nuci_25740  | MTD-C25740  | Skin        | Himalaya          |
| <i>Nucifraga</i> | <i>caryocatactes</i> | <i>hemispila</i>   | NRM                           | Nuci_572264 | NRM572264   | Skin        | N/A               |
| <i>Nucifraga</i> | <i>caryocatactes</i> | <i>interdicta</i>  | SNSD                          | Nuci_23063  | MTD-C23063  | Skin        | Beijing           |
| <i>Nucifraga</i> | <i>caryocatactes</i> | <i>interdicta</i>  | NRM                           | Nuci_572237 | NRM572237   | Skin        | Shansi            |
| <i>Nucifraga</i> | <i>caryocatactes</i> | <i>macella</i>     | ZMMU                          | Nuci_2155   | EAK 416     | Tissue      | Gansu             |
| <i>Nucifraga</i> | <i>caryocatactes</i> | <i>macella</i>     | Collection J. Martens at SNSD | Nuci_9308   | MAR 9308    | Tissue      | Gansu             |
| <i>Nucifraga</i> | <i>caryocatactes</i> | <i>owstoni</i>     | SNSD                          | Nuci_44762  | MTD-C44762  | Skin        | Mt Arisa          |
| <i>Nucifraga</i> | <i>caryocatactes</i> | <i>owstoni</i>     | NRM                           | Nuci_572238 | NRM572238   | Skin        | Taiwan            |
| <i>Nucifraga</i> | <i>multipunctata</i> |                    | SNSD                          | Nuci_19464  | MTD-C19464  | Skin        | Kashmir           |
| <i>Nucifraga</i> | <i>multipunctata</i> |                    | NRM                           | Nuci_572239 | NRM572239   | Skin        | Muski             |
| <i>Nucifraga</i> | <i>multipunctata</i> |                    | NHMD                          | Nuci_A      | 68845       | Skin        | Nuristan          |
| <i>Nucifraga</i> | <i>multipunctata</i> |                    | NHMD                          | Nuci_B      | 68855       | Skin        | Nuristan          |

**Supplementary Table 8. Short read mapping statistics.**

| Sample ID   | Species                 | subspecies           | Number of reads (millions) | % mapped | Coverage | ≥ 10X  |
|-------------|-------------------------|----------------------|----------------------------|----------|----------|--------|
| Nuci_0516   | <i>N. caryocatactes</i> | <i>caryocatactes</i> | 200.5                      | 93.50%   | 26.5X    | 85.50% |
| Nuci_191    | <i>N. caryocatactes</i> | <i>caryocatactes</i> | 165                        | 86.60%   | 19.0X    | 80.00% |
| Nuci_192    | <i>N. caryocatactes</i> | <i>caryocatactes</i> | 187.9                      | 94.30%   | 24.0X    | 82.50% |
| Nuci_S2     | <i>N. caryocatactes</i> | <i>caryocatactes</i> | 139.9                      | 93.90%   | 17.0X    | 78.40% |
| Nuci_1600   | <i>N. caryocatactes</i> | <i>japonica</i>      | 164.3                      | 94.20%   | 17.0X    | 76.00% |
| Nuci_4353   | <i>N. caryocatactes</i> | <i>japonica</i>      | 91.6                       | 95.40%   | 10.0X    | 51.60% |
| Nuci_0754   | <i>N. caryocatactes</i> | <i>japonica</i>      | 124.3                      | 90.30%   | 15.5X    | 83.70% |
| Nuci_123    | <i>N. caryocatactes</i> | <i>macrorhynchos</i> | 164.3                      | 96.30%   | 19.0X    | 77.30% |
| Nuci_1356   | <i>N. caryocatactes</i> | <i>macrorhynchos</i> | 144.45                     | 93.20%   | 19X      | 84.40% |
| Nuci_2156   | <i>N. caryocatactes</i> | <i>macrorhynchos</i> | 179.55                     | 91.50%   | 23X      | 85.10% |
| Nuci_2161   | <i>N. caryocatactes</i> | <i>macrorhynchos</i> | 133.3                      | 94.50%   | 17.5X    | 84.10% |
| Nuci_3573   | <i>N. caryocatactes</i> | <i>macrorhynchos</i> | 150                        | 92.20%   | 19.5X    | 84.50% |
| Nuci_N11    | <i>N. caryocatactes</i> | <i>macrorhynchos</i> | 173.5                      | 95.20%   | 22.0X    | 82.00% |
| Nuci_122    | <i>N. caryocatactes</i> | <i>macrorhynchos</i> | 150.4                      | 95.70%   | 20.0X    | 82.00% |
| Nuci_21727  | <i>N. caryocatactes</i> | <i>rothschildi</i>   | 124.6                      | 94.70%   | 14.0X    | 74.40% |
| Nuci_572263 | <i>N. caryocatactes</i> | <i>rothschildi</i>   | 106.8                      | 95.00%   | 14.0X    | 74.50% |
| Nuci_roth   | <i>N. caryocatactes</i> | <i>rothschildi</i>   | 136.1                      | 94.80%   | 15.0X    | 76.90% |
| Nuci_col    | <i>N. columbiana</i>    |                      | 120.1                      | 94.10%   | 15.0X    | 77.40% |
| Nuci_25740  | <i>N. caryocatactes</i> | <i>hemispila</i>     | 103.4                      | 94.90%   | 12.0X    | 67.30% |
| Nuci_572264 | <i>N. caryocatactes</i> | <i>hemispila</i>     | 77.2                       | 95.40%   | 8.0X     | 40.60% |
| Nuci_23063  | <i>N. caryocatactes</i> | <i>interdicta</i>    | 96.2                       | 94.10%   | 10.0X    | 52.70% |
| Nuci_572237 | <i>N. caryocatactes</i> | <i>interdicta</i>    | 123.5                      | 86.70%   | 17.0X    | 78.30% |
| Nuci_2155   | <i>N. caryocatactes</i> | <i>macella</i>       | 155.55                     | 90.40%   | 20X      | 84.50% |
| Nuci_9308   | <i>N. caryocatactes</i> | <i>macella</i>       | 158.35                     | 92.80%   | 20.5X    | 85.10% |
| Nuci_44762  | <i>N. caryocatactes</i> | <i>owstoni</i>       | 129.6                      | 93.80%   | 14.0X    | 70.80% |
| Nuci_572238 | <i>N. caryocatactes</i> | <i>owstoni</i>       | 152.3                      | 95.20%   | 22.0X    | 81.50% |
| Nuci_19464  | <i>N. multipunctata</i> |                      | 127.1                      | 94.30%   | 13.0X    | 70.30% |
| Nuci_572239 | <i>N. multipunctata</i> |                      | 154                        | 96.20%   | 23.0X    | 81.20% |
| Nuci_A      | <i>N. multipunctata</i> |                      | 61.8                       | 95.90%   | 8.0X     | 24.20% |
| Nuci_B      | <i>N. multipunctata</i> |                      | 123.7                      | 95.20%   | 15.0X    | 74.70% |
| Corvus_cor  | <i>Corvus cornix</i>    |                      | 174.47                     | 95.45%   | 15.1X    | 82.22% |

**Supplementary Table 9. Additional taxa included in the divergence times estimation.** Whole mitochondrial genomes were extracted from the NCBI database for a total of 27 additional taxa in order to include selected fossil calibration points for optimal divergence time estimation.

| Species                   | Scientific name                         | NCBI Acc. Number |
|---------------------------|-----------------------------------------|------------------|
| New Zealand rock wren     | <i>Xenicus gilviventris</i>             | KX369033         |
| Rifleman                  | <i>Acanthisitta chloris</i>             | AY325307         |
| Northern crested caracara | <i>Caracara cheriway</i>                | MN231451         |
| Kakapo                    | <i>Strigops habroptila isolate Jane</i> | CM013787         |
| Kea                       | <i>Nestor notabilis</i>                 | KX369037         |
| Greater vasa parrot       | <i>Coracopsis vasa</i>                  | KM611468         |
| Peregrine falcon          | <i>Falco peregrinus</i>                 | JQ282801         |
| Blackish-grey antshrike   | <i>Thamnophilus nigrocinereus</i>       | KJ909192         |
| Great-billed seed finch   | <i>Sporophila maximiliani</i>           | MF327582         |
| Tristram's bunting        | <i>Emberiza tristrami</i>               | HQ896035         |
| Eurasian Magpie           | <i>Pica pica</i>                        | HQ915867         |
| Eurasian Jay              | <i>Garrulus glandarius</i>              | JN018413         |
| Henderson's ground jay    | <i>Podoces hendersoni</i>               | GU592504         |
| Azure-winged magpie       | <i>Cyanopica cyanus koreensis</i>       | KT934323         |
| Azure-winged magpie       | <i>Cyanopica cyanus</i>                 | JN108020         |
| Alpine chough             | <i>Pyrrhocorax graculus</i>             | KJ598623         |
| Red-billed chough         | <i>Pyrrhocorax pyrrhocorax</i>          | KJ598622         |
| Red-billed blue magpie    | <i>Urocissa erythrorhyncha</i>          | JQ423932         |
| Taiwan blue magpie        | <i>Urocissa caerulea</i>                | MG932654         |
| Dusky woodswallow         | <i>Artamus cyanopterus</i>              | KY994613         |
| Black-faced woodswallow   | <i>Artamus cinereus</i>                 | MF784400         |
| Black-naped oriole        | <i>Oriolus chinensis</i>                | JQ083495         |
| Grey-cheeked fulvetta     | <i>Alcippe morrisonia hueti</i>         | KX376475         |
| Fairy pitta               | <i>Pitta nympha</i>                     | KJ680302         |
| Ochre-bellied flycatcher  | <i>Mionectes oleagineus</i>             | KJ742591         |
| Mongolian lark            | <i>Melanocorypha mongolica</i>          | KY887027         |
| Hooded Crow               | <i>Corvus cornix</i>                    | CM002877         |
| Clark's nutcracker        | <i>Nucifraga columbiana</i>             | KF509923         |

**Supplementary Table 10. Phenotypic traits measured for the morphometric analyses.** Description of morphological traits measured on museum specimens.

| Functional association | Morphological traits    | Description                                                                                                                                       |
|------------------------|-------------------------|---------------------------------------------------------------------------------------------------------------------------------------------------|
| Foraging and diet      | Bill length             | Distance from commissural point of upper and lower bill to tip of closed bill                                                                     |
|                        | Bill depth              | Maximum height from the angle at front of skull                                                                                                   |
|                        | Bill width              | External distance between the two commissural points                                                                                              |
| Flight ability         | Wing length             | Distance from carpal joint to longest primary                                                                                                     |
|                        | Kipp's distance         | Distance between tip of first secondary and tip of longest primary in naturally folded wing                                                       |
|                        | Distal distance         | Distance between tip of outermost primary and tip of wing                                                                                         |
| Maneuverability        | Tail length             | Distance from where the bases of the two innermost rectrices emerge from the skin to the tip of the longest tail feather in naturally folded tail |
|                        | Tail graduation         | Distance from tip of longest to tip of shortest tail feather in naturally folded tail                                                             |
| Bipedal locomotion     | Back toe length         | Distance between back toes and tarsus                                                                                                             |
|                        | Tarsus length           | Distance from joint between tarsus toes to intertarsal joint                                                                                      |
|                        | Lateral tarsus diameter | Diameter of lateral tarsus                                                                                                                        |
| Plumage color          | White extent of tail    | White extensions on the outermost rectrices measured from where the bases of the rectrices emerge from the skin                                   |



**Supplementary Table 11. Plant-bird associations.** References for interaction between food plants and nutcracker along with the reference for the plant distribution. For distribution maps see Supplementary Figure 1.

| Scientific name           | Common Name          | Plant Distribution reference        | Literature reference Bird association              |
|---------------------------|----------------------|-------------------------------------|----------------------------------------------------|
| <i>Picea abies</i>        | Norway Spruce        | Euforgen <sup>10</sup>              | Haffer <sup>18</sup> ; Cramp et al. <sup>19</sup>  |
| <i>Picea schrenchiana</i> | Schrenk's Spruce     | Vidakovic <sup>11</sup>             | Grote <sup>20,21</sup>                             |
| <i>Corylus avellana</i>   | Common Hazel         | Bassil et al. <sup>12</sup>         | Kleinschmidt <sup>22</sup> ; Rolando <sup>23</sup> |
| <i>C. chinensis</i>       | Chinese Hazel        | Bassil et al. <sup>12</sup>         |                                                    |
| <i>C. colurana</i>        | Turkish Hazel        | Bassil et al. <sup>12</sup>         |                                                    |
| <i>C. fargesii</i>        | Farges' Hazel        | Bassil et al. <sup>12</sup>         |                                                    |
| <i>C. ferox</i>           | Himalayan Hazel      | Bassil et al. <sup>12</sup>         |                                                    |
| <i>C. heterophylla</i>    | Asian Hazel          | Bassil et al. <sup>12</sup>         |                                                    |
| <i>C. jacquemontii</i>    | Jacquemont's Hazel   | Bassil et al. <sup>12</sup>         |                                                    |
| <i>C. sieboldiana</i>     | Japanese Hazel       | Bassil et al. <sup>12</sup>         |                                                    |
| <i>Pinus cembra</i>       | Swiss stone pine     | Euforgen <sup>13</sup>              | Mattes <sup>24,25</sup>                            |
| <i>P. sibirica</i>        | Siberian pine        | Nakazawa et al. <sup>14</sup>       | Grote <sup>21</sup> ; Mezheny <sup>26</sup>        |
| <i>P. pumila</i>          | Siberian dwarf pine  | Critchfield & Little <sup>15</sup>  | Chiba <sup>27</sup>                                |
| <i>P. koraiensis</i>      | Korean pine          | Critchfield & Little <sup>15</sup>  | Mattes <sup>24</sup>                               |
| <i>P. gerardiana</i>      | Gerrard's Pine       | Critchfield & Little <sup>15</sup>  | Ali & Ripley <sup>28</sup>                         |
| <i>P. parviflora</i>      | Japanese white pine  | Critchfield & Little <sup>15</sup>  | Hayashida <sup>29,30</sup>                         |
| <i>P. mugo</i>            | Dwarf Mountain Pine  | Critchfield & Little, <sup>15</sup> | Haffer, 1993 <sup>18</sup>                         |
| <i>P. sylvestris</i>      | Scots Pine           | Nakazawa et al. <sup>14</sup>       | Haffer, 1993 <sup>18</sup>                         |
| <i>P. peuce</i>           | Balkan Pine          | Critchfield & Little <sup>15</sup>  | Cramp et al. <sup>19</sup>                         |
| <i>P. heldreichii</i>     | Heldreich's Pine     | Critchfield & Little, <sup>15</sup> | Kleinschmidt <sup>22</sup>                         |
| <i>P. wallichiana</i>     | Himalayan white pine | Critchfield & Little, <sup>15</sup> | Ali & Ripley <sup>28</sup>                         |
| <i>P. nigra</i>           | Austrian Pine        | Critchfield & Little <sup>15</sup>  | Cramp et al. <sup>19</sup>                         |
| <i>P. amamiana</i>        | Amami Pine           | Kanetani et al. <sup>16</sup>       | Farjón <sup>31</sup>                               |
| <i>P. armandii</i>        | Armand's Pine        | Critchfield & Little <sup>15</sup>  | Farjón <sup>31</sup>                               |
| <i>P. pinea</i>           | Stone Pine           | Euforgen, 2009 <sup>17</sup>        | Farjón <sup>31</sup>                               |
| <i>P. fenzeliana</i>      | Fenzel's Pine        | Critchfield & Little <sup>15</sup>  | Farjón <sup>31</sup>                               |

## References

1. Nadachowska-Brzyska, K., Burri, R., Smeds, L. & Ellegren, H. PSMC analysis of effective population sizes in molecular ecology and its application to black-and-white *Ficedula* flycatchers. *Mol. Ecol.* **25**, 1058-1072 (2016).
2. Vijay N. *et al.* Evolution of heterogeneous genome differentiation across multiple contact zones in a crow species complex. *Nat. Commun.* **7**, 13195 (2016).
3. BirdLife International Species factsheet: *Nucifraga caryocatactes*. <http://www.birdlife.org> (2020).
4. Päckert, M. *et al.* A revised phylogeny of nuthatches (Aves, Passeriformes, *Sitta*) reveals insight in intra- and interspecific diversification patterns in the Palearctic. *Vertebr. Zool.* **70**, 241-262 (2020).
5. Päckert, M. *et al.* Horizontal and elevational phylogeographic patterns of Himalayan and Southeast Asian forest passerines (Aves: Passeriformes). *J Biogeogr.* **39**, 556-573 (2012).
6. Päckert, M. *et al.* Out of Tibet and out of Himalayas: centers of origin and diversification of passerine birds in the Qinghai-Tibet Plateau region. *Ecol. Evol.* **10**, 9283-9300 (2020).
7. Alström, P. *et al.* Complete species-level phylogeny of the leaf warbler (Aves: Phylloscopidae) radiation. *Mol. Phylogenet. Evol.* **126**, 141-152 (2018).
8. Oliveros, C. H. *et al.* Earth history and the passerine superradiation. *Proc. Natl. Acad. Sci. U. S. A.* **116**, 7916-7925 (2019).
9. Jarvis, E. *et al.* Whole-genome analyses resolve early branches in the tree of life of modern birds. *Science* **346**, 1320–1331. (2014).
10. Euforgen, 2009. Distribution map of Norway spruce (*Picea abies*). Retrieved from [www.euforgen.org](http://www.euforgen.org) on 18th October 2017.
11. Vidakovic, M. *Conifers: morphology and variation*. (Graficki zavod Hrvatske, 1991).
12. Bassil, N., Boccacci, P., Roberto, B., Postman, J., & Mehlenbacher, S. Nuclear and chloroplast microsatellite markers to assess genetic diversity and evolution in hazelnut species, hybrids and cultivars. *Genetic Resources and Crop Evolution* **60**, 543-568 (2013).
13. Euforgen, 2009. Distribution map of Swiss stone pine (*Pinus cembra*). Retrieved from [www.euforgen.org](http://www.euforgen.org) on 18th October 2017.
14. Nakazawa, F. *et al.* DNA analysis for section identification of individual *Pinus* pollen grains from Belukha glacier, Altai Mountains, Russia. *Environmental Research Letters* **8**, 014032 (2013).
15. Critchfield, W. B. & Little, E. L. Geographic distribution of the pines of the world. U.S. Department of Agriculture, Washington, D.C., Miscellaneous Publication 991,1-97 (1966).
16. Kanetani, S., Kawahara, T., Kanazashi, A. & Yoshimaru, H. Diversity and conservation of genetic resources of an endangered five-needle pine species, *Pinus armandii* Franch. var. *amamiana* (Koidz.) Hatusima. *SDA Forest Service Proceedings, RMRS-P-32*, 188–191 (2004).
17. Euforgen, 2009. Distribution map of the Italian stone pine (*Pinus pinea*). Downloaded from [www.euforgen.org](http://www.euforgen.org) on 18th October 2017.
18. Haffer, J. *Nucifraga caryocatactes* (Linnaeus 1758) – Tannenhäher. In: *Glutz von Blotzheim, U. N., Bauer, K.: Handbuch der Vogel Mitteleuropas. Vol. 13/III: Corvidae – Sturnidae*. (AULA-Verlag, 1993)

19. Cramp, S., Perrins, C. M., Brooks, D. J. *Handbook of the Birds of Europe, the Middle East and North Africa. The Birds of the Western Palearctic. Vol. VIII: Crows to Finches.* (Oxford University Press, 1994).
20. Grote, H. Zur Biologie des Tannenhähers *Nucifraga caryocatactes*. *Der Vogelzug* **11**, 127-129 (1940).
21. Grote, H. Ueber die Lebensweise des Schlankschnäbligen Tannenhähers in Sibirien. *Ornithologischer Beobachter* **44**, 84-90 (1947).
22. Kleinschmidt, O. *Corvus Nucifraga*. (Berajah, Zoographica infinita, 1909-11).
23. Rolando, A. Home range and habitat selection by the Nutcracker *Nucifraga caryocatactes* during autumn in the Alps. *Ibis* **138**, 383-390 (1996).
24. Mattes, H. Der Tannenhäher im Engadin. Studien zu seiner Ökologie und Funktion im Arvenwald. *Münsterische Geographische Arbeiten* **2**, 1-78 (1978).
25. Mattes, H. Die Lebensgemeinschaft von Tannenhäher, *Nucifraga caryocatactes* (L) und Arve, *Pinus cembra* L., und ihre forstliche Bedeutung in der oberen Gebirgswaldstufe. Eidgenössische Anstalt für das Forstliche Versuchswesen, Birmensdorf, 241, 1-74 (1982).
26. Mezhenyj, A. A. Biology of the nutcracker *Nucifraga caryocatactes macrorhynchos* in South Yakutia. *Zoologicheskii Zhurnal* **43**, 1679-1687 (1964).
27. Chiba, S. Analysis of stomach content of *Nucifraga caryocatactes* and *Apus pacificus* of Japan. *Journal of the Yamashina Institute for Ornithology* **5**, 287-297 (1968).
28. Ali, S. & Ripley, S. D. *Handbook of the Birds of India and Pakistan, together with those of Nepal, Bhutan and Ceylon. Vol. V.* (Oxford University Press, 1972).
29. Hayashida, M. Seed dispersal and regeneration patterns of *Pinus parviflora* var. *pentaphylla* on Mt. Apoi in Hokkaido. *Research Bulletin of Hokkaido University Forests* **46**, 177-190 (1989).
30. Hayashida, M. Role of nutcrackers on seed dispersal and establishment of *Pinus pumila* and *P. entaphylla*. In: Schmidt, W. C., Holtmeier, F. K. (eds): *Proceedings-International Workshop on Subalpine Stone Pines and Their Environment: the Status of Our Knowledge*. General Technical Report **INT-309**, Odgen: USDA Forest Service, IRS. 159-162 (1994).
31. Farjón, A. *A Handbook of the World's Conifers. Vol II.* (Brill, 2010)
